# Supplementary material for: Surfaceome interrogation using an RNA-seq approach highlights leukemia initiating cell biomarkers in an LMO2 T cell transgenic model
Source: PubMed Central journal article supplement (PMC6453905; doi:10.1038/s41598-019-42214-w), 2019-04-08
Supplement: 41598_2019_42214_MOESM1_ESM.pdf [file 41598_2019_42214_MOESM1_ESM.pdf]

Surfaceome interrogation using an RNA-seq approach highlights leukemia initiating cell biomarkers in an *LMO2* T cell transgenic model

Helio Pais, Katia Ruggero, Jing Zhang, Osama Al-Assar, Nicolas Bery, Ravneet Bhuller, Victoria Weston, Pamela R. Kearns, Cristina Mecucci, Ami Miller & Terence H. Rabbitts\*

Supplementary figures 1-10

Supplementary Tables 1-8

**Supplementary Figure S1**

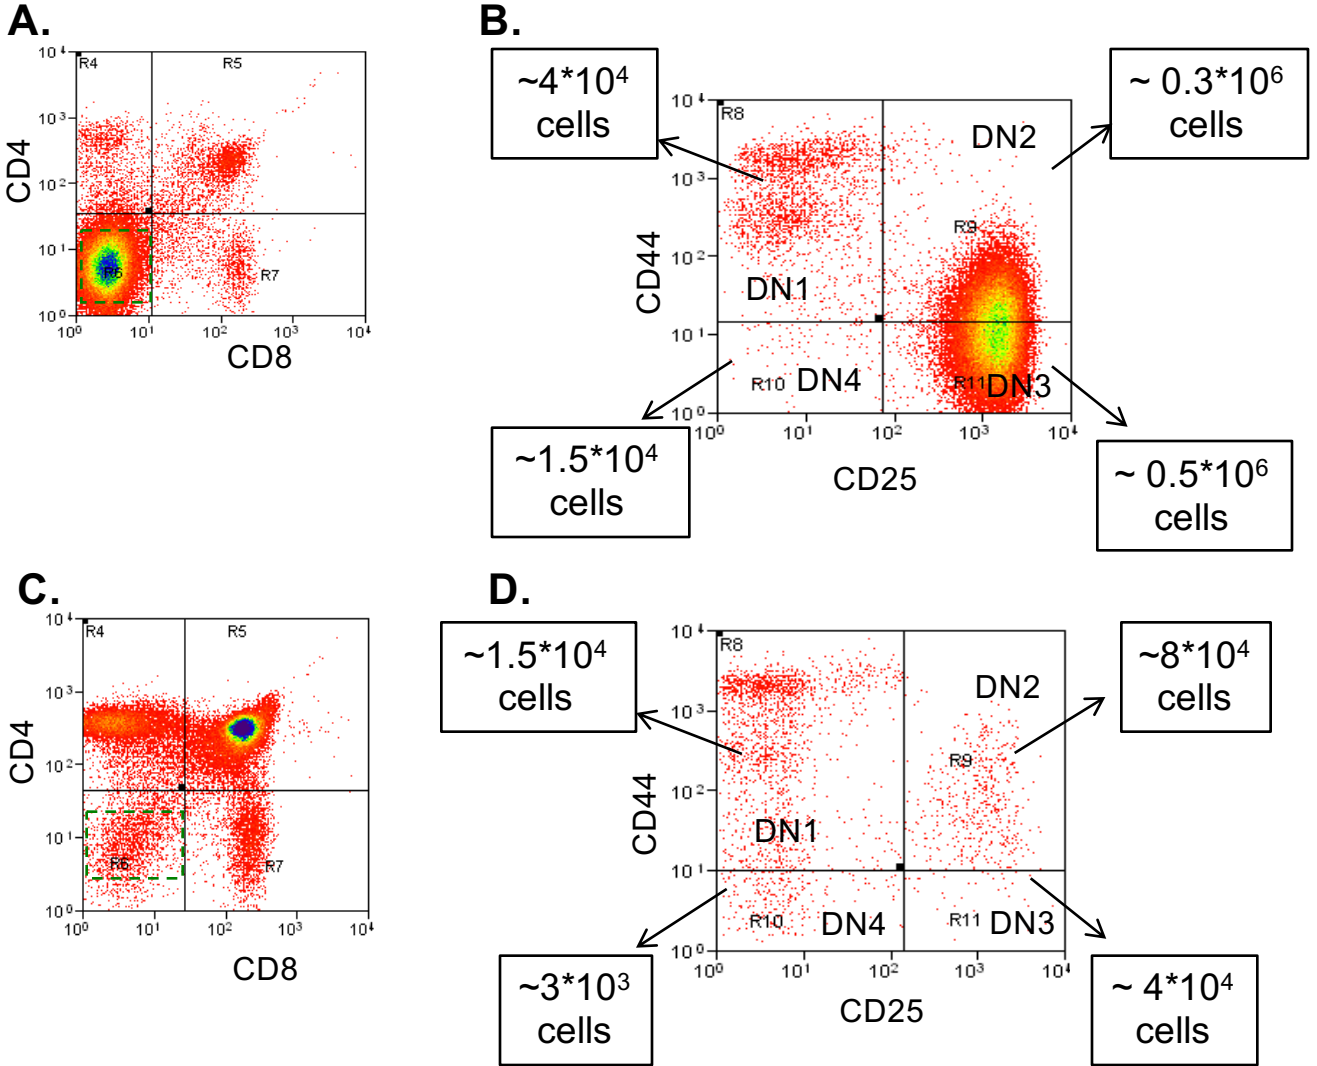

**Supplementary Figure S1. Separation of DN thymocytes populations from *Lck-Lmo2* transgenic and wild type thymocytes for RNA-seq**

19-21 week old mice (three for each genotype) were used to source thymocytes that separated into the four CD4-CD8- DN populations using CD90, CD4, CD8, CD44 and CD25 antibodies. The DN cells were separated by flow cytometry and RNA made directly from the indicated yields of cells.

A, C, Profile of CD4; CD8 cells from *Lck-Lmo2* and wild type mice respectively

B, D. CD44; CD25 profile and the yield of cells in each sub-type from *Lck-Lmo2* and wild type mice respectively

## Supplementary Figure S2

| WT, DN1 | WT, DN2 | WT, DN3 | WT, DN4 | LckLmo2, DN1 | LckLmo2, DN2 | LckLmo2, DN3 | LckLmo2, DN4 |              |
|---------|---------|---------|---------|--------------|--------------|--------------|--------------|--------------|
| 1.00    | 0.90    | 0.89    | 0.90    | 0.93         | 0.89         | 0.89         | 0.88         | WT, DN1      |
|         | 1.00    | 0.94    | 0.93    | 0.90         | 0.94         | 0.93         | 0.92         | WT, DN2      |
|         |         | 1.00    | 0.93    | 0.89         | 0.92         | 0.93         | 0.92         | WT, DN3      |
|         |         |         | 1.00    | 0.89         | 0.93         | 0.93         | 0.93         | WT, DN4      |
|         |         |         |         | 1.00         | 0.91         | 0.90         | 0.89         | LckLmo2, DN1 |
|         |         |         |         |              | 1.00         | 0.96         | 0.94         | LckLmo2, DN2 |
|         |         |         |         |              |              | 1.00         | 0.94         | LckLmo2, DN3 |
|         |         |         |         |              |              |              | 1.00         | LckLmo2, DN4 |

### Supplementary Figure S2. Correlation table of RNA populations from DN *Lck-Lmo2* transgenic and wild type thymocytes

The yellow cells show the correlation values between the RNA sub-population isolated from either wild type (for instance, wild type, DN1 vs wild type, DN2) or from *Lck-Lmo2* transgenic, and the blue cells show the correlation between sub-populations of wild type compared to *Lck-Lmo2* transgenic. The dark blue cells show the correlation between corresponding pairs of sub-populations in wild type and *Lck-Lmo2*. The correlation values are high, confirming the high similarity between the expression profiles in the two.

**Supplementary Figure S3**

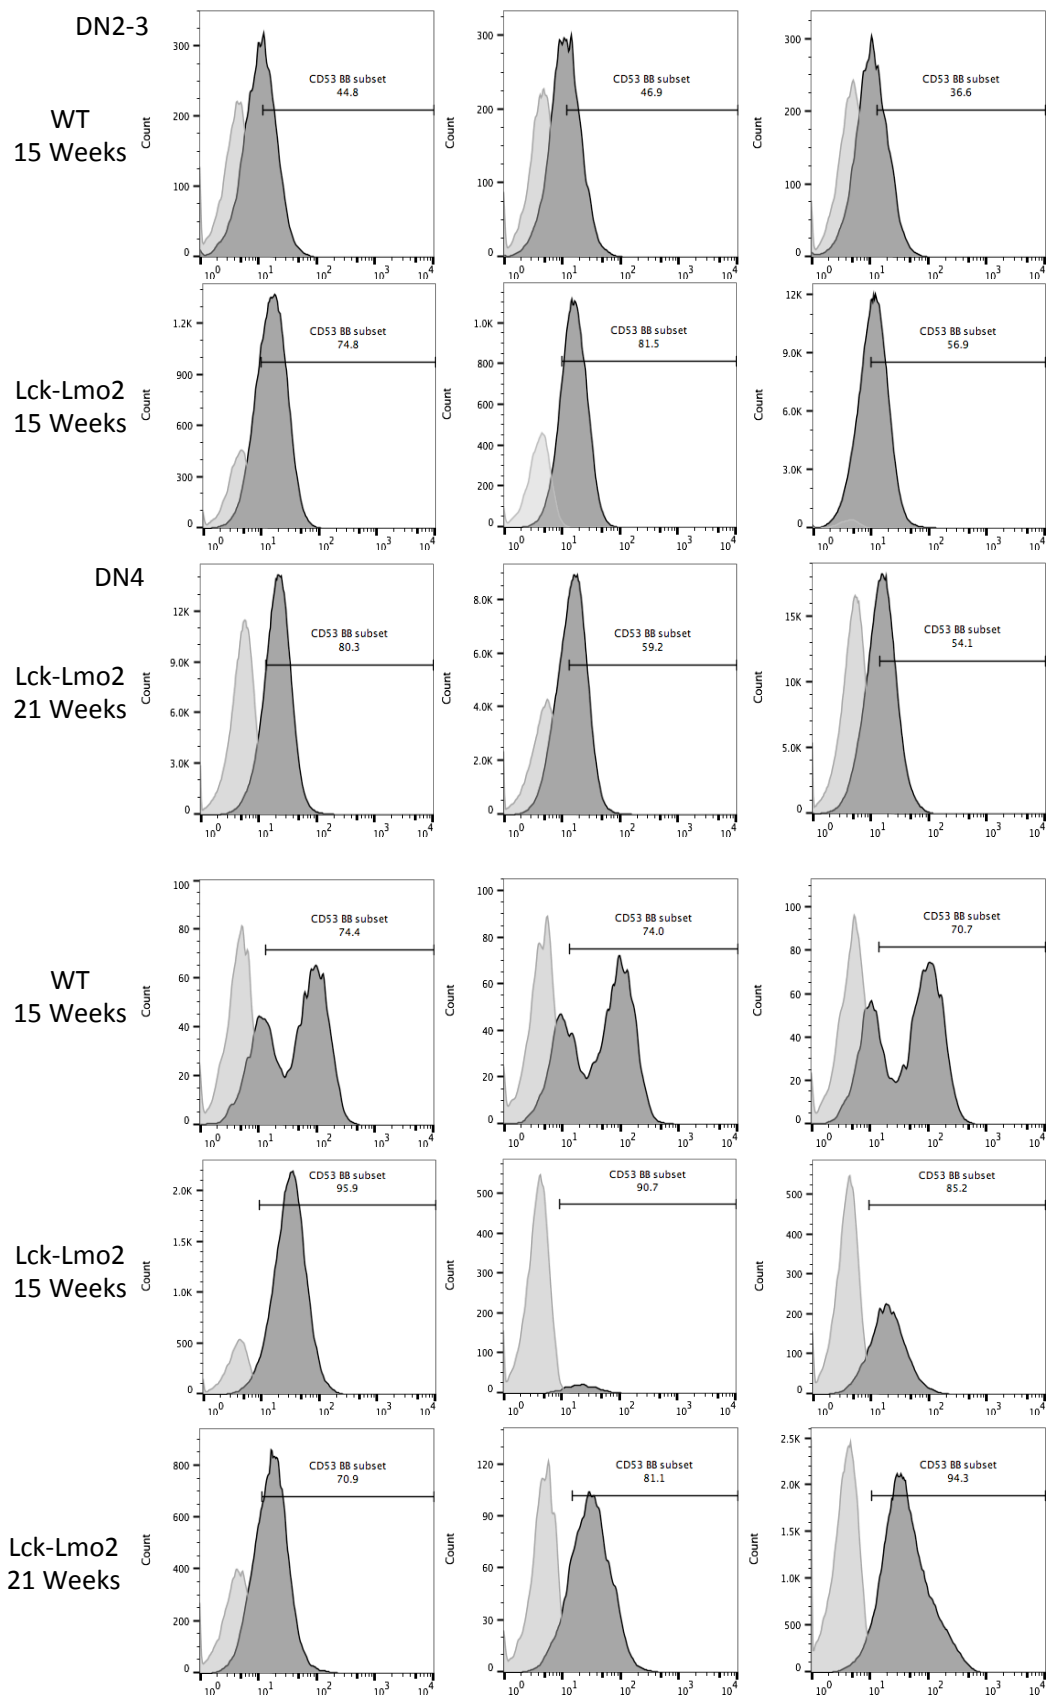

**Supplementary Figure S3. Flow cytometry of CD53 expression on asymptomatic *Lck-Lmo2* mouse DN thymocytes.**

Thymocytes were prepared as single cell suspensions from *Lck-Lmo2* mice or wild type equivalents and analyzed by flow cytometry with anti-CD53 antibodies. Expression of CD53 was measured in three wild type or three asymptomatic *Lck-Lmo2* mice (wild type mice, 15 weeks old; Lck-LMO2, 3 mice 15 weeks old, 3 mice 21 weeks old). The plots show the results for CD53-expressing cells (dark grey) compared with the isotype control (light grey) for pooled DN2-3 and for DN4 cells. The x-axis shows fluorescence on a log scale.

## Supplementary Figure S4

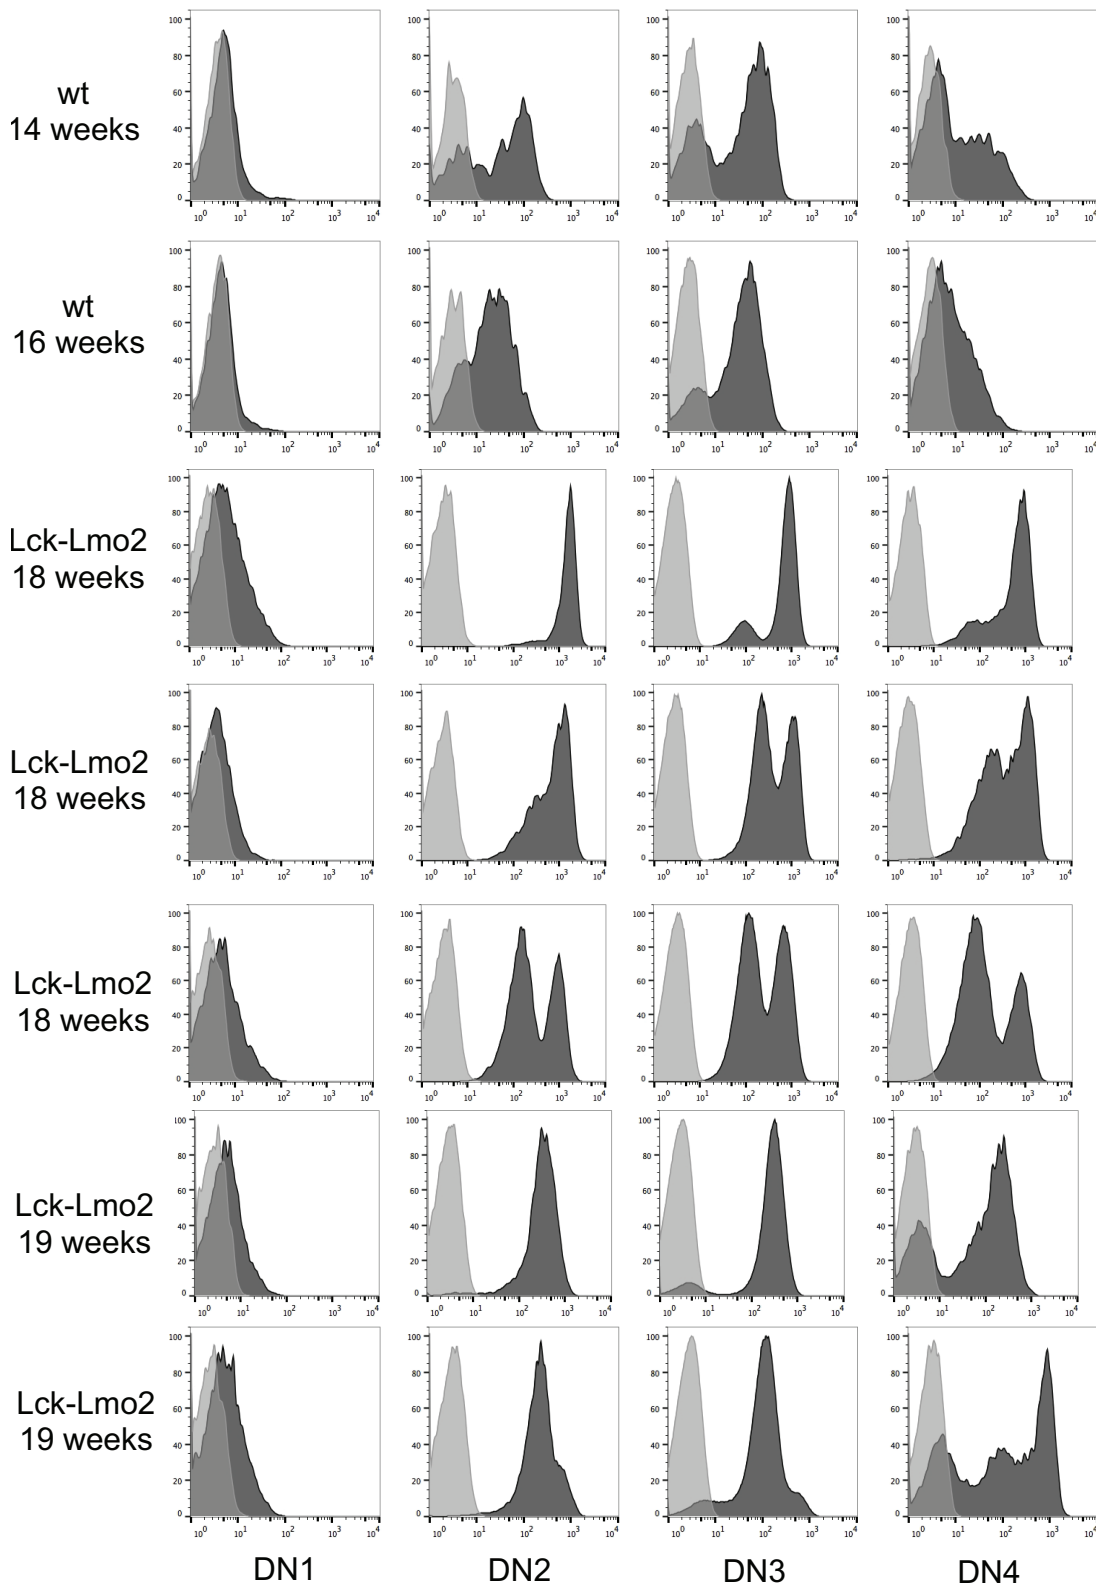

**Supplementary Figure S4. Flow cytometry of CD59a expression on asymptomatic *Lck-Lmo2* mouse DN thymocytes.**

Thymocytes were prepared as single cell suspensions from *Lck-Lmo2* mice or wild type equivalents and analyzed by flow cytometry with anti-CD59a antibody. Expression of CD59a was measured in two wild type (14 and 16 weeks old) or five asymptomatic *Lck-Lmo2* mice (18 or 19 weeks old). The curves show the results for CD59a-expressing cells (black) compared with the isotype control (grey) for pooled DN1, DN2, DN3 and DN4 cells. The x-axis shows fluorescence on a log scale.

**Supplementary Figure S5**

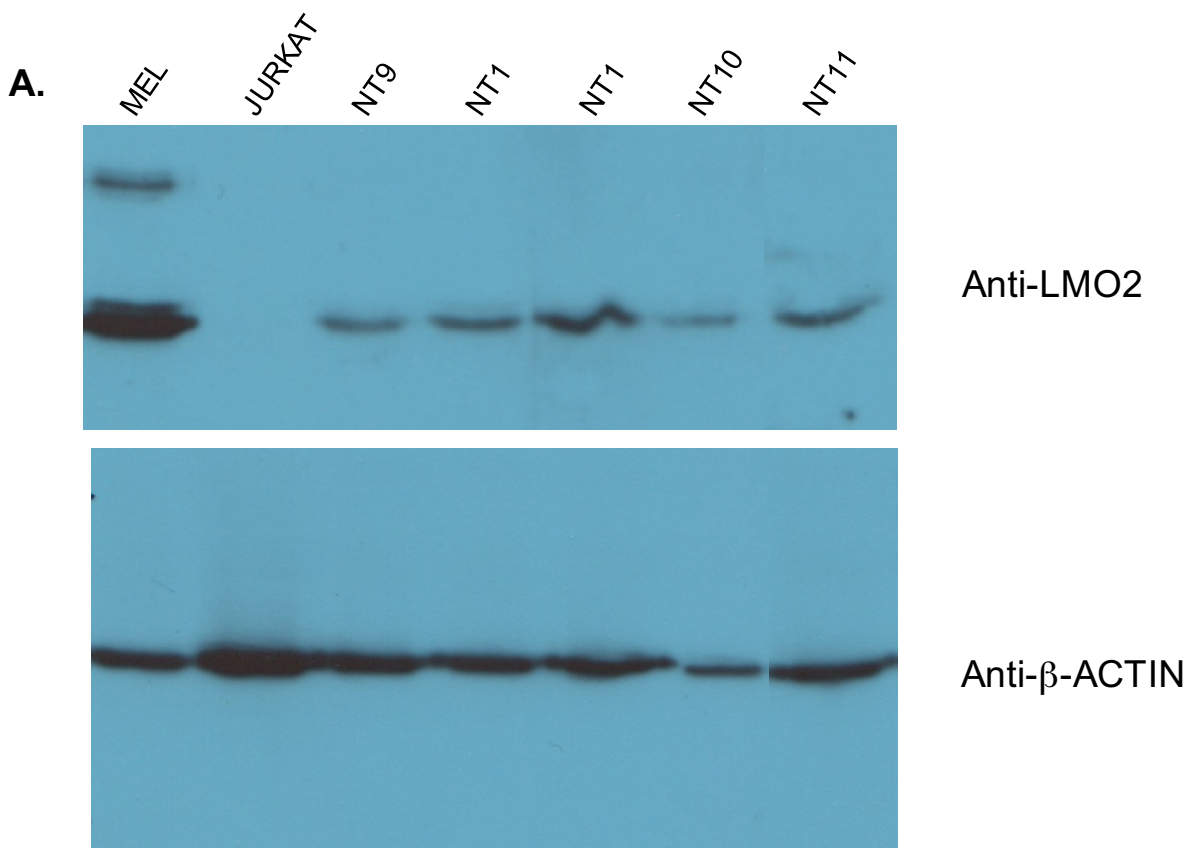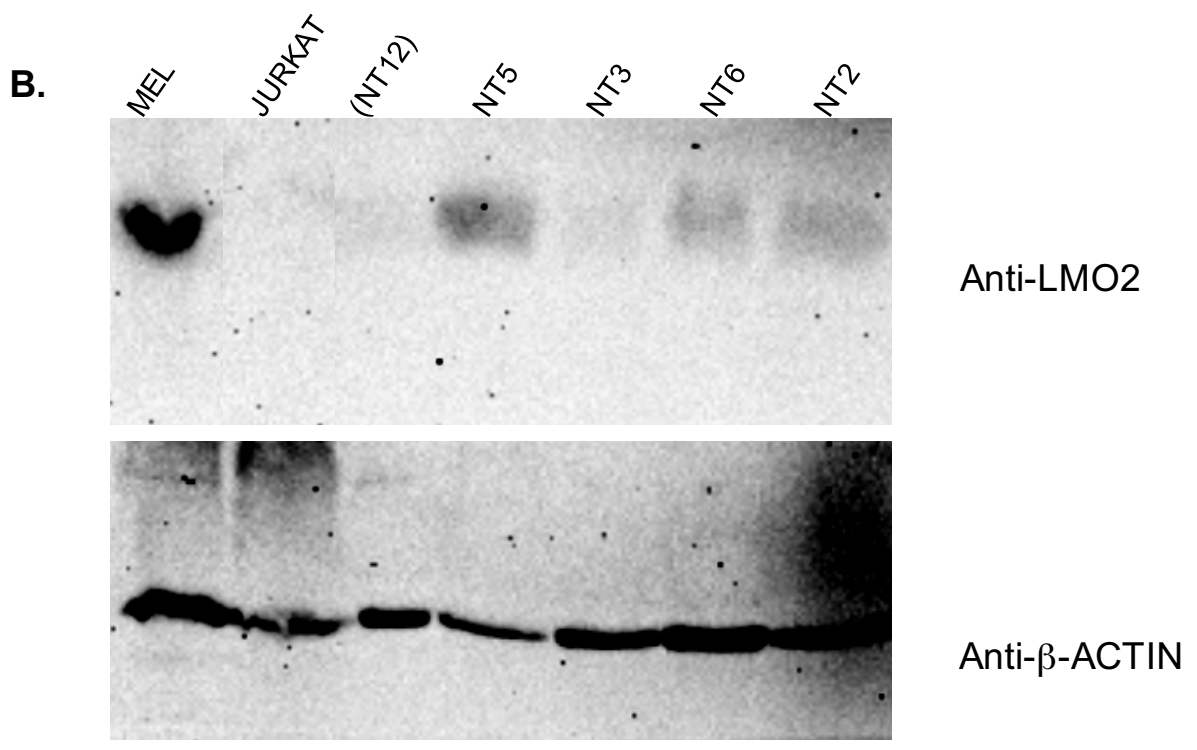

**Supplementary Figure S5. Western blot analysis of LMO2 expression in human T-ALL lacking LMO2-associated translocations**

1x 10<sup>5</sup> primary human T-ALL cells were lysed in SDS-PAGE loading buffer, boiled for 5 mins with 10mM β-mercaptoethanol and fractionated on to 15% SDS-PAGE. The gel was blotted on to nylon membranes which were incubated with mouse anti-human LMO2 antibody and signal detected using ECL methods with anti-mouse HRP for development. Anti-β-ACTIN antibody was applied to the membranes as protein loading controls.

# Supplementary Figure S6

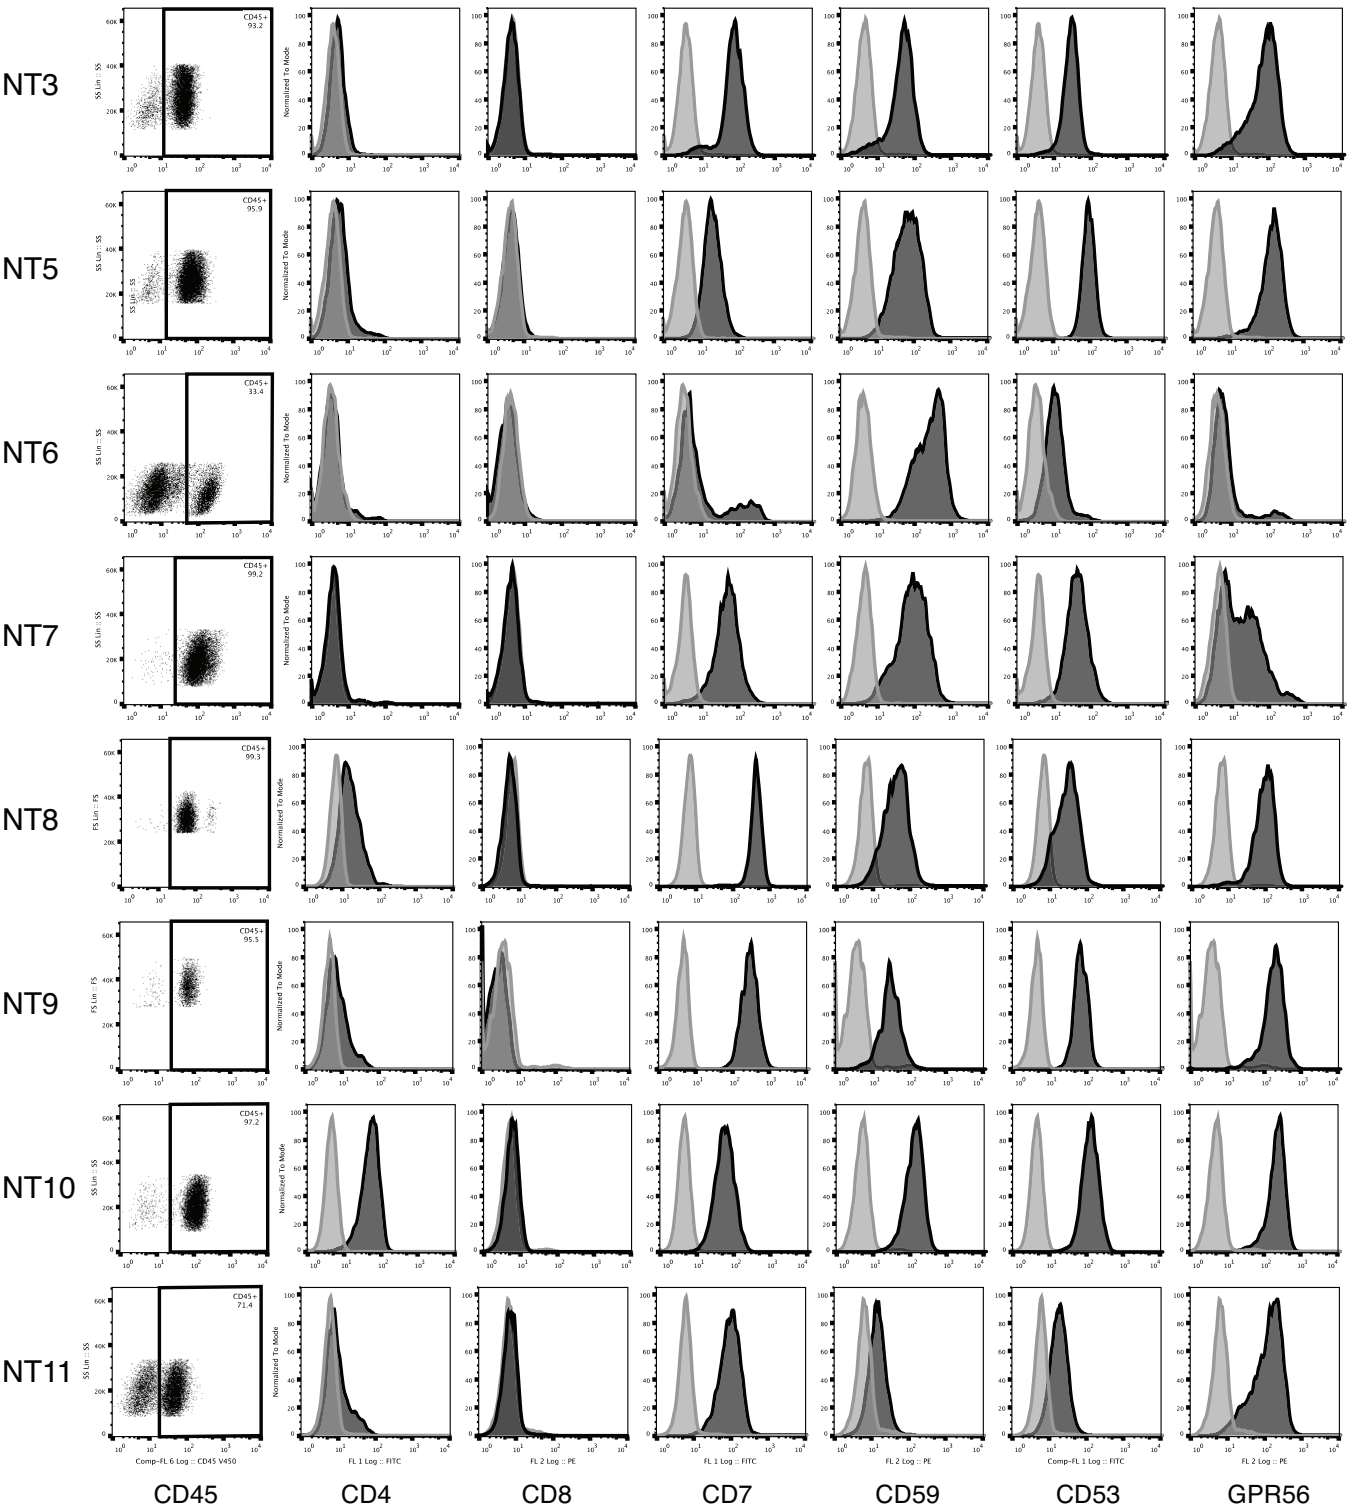

## Supplementary Figure S6. Surface expression of identified markers on primary human leukaemia samples.

Eight human T-ALL samples (NT3-NT11, lacking LMO2 chromosomal translocations) were analysed for cell surface marker expression. The left hand column of dot plots shows percentage of CD45+ cells present in each leukaemic sample. All the other antibody staining are gated on the CD45+ population and each histogram shows the result for CD45+ cells on stained cells (dark grey) and cells unstained or stained with isotype control (light grey). The x axes shows the fluorescence in log scale, the y axes represent count in cell number (scaled as a percentage of maximum count).

## Supplementary Figure S7

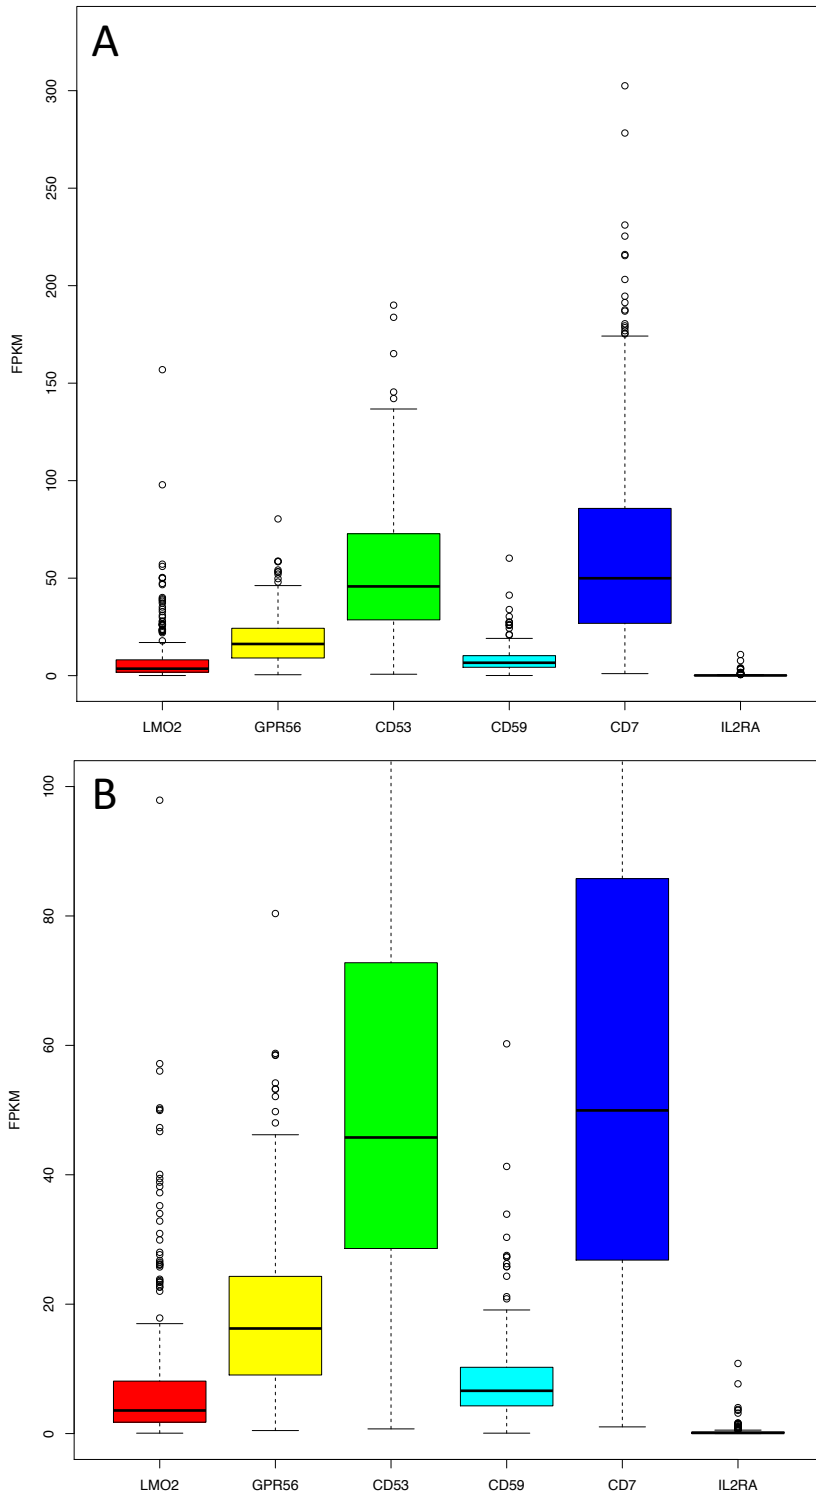

**Supplementary Figure S7.** The boxplots show the overall range and distribution of the gene expression levels (FPKM) of LMO2, GPR56, CD53, CD59, CD7 and IL2RA in 264 pediatric and young adult T-ALL samples. Panel A: the y axis is the FPKM values from 0 to 300 Panel B: the y axis is expanded FPKM values from 0 to 100

The data are from Liu Y et. al. The genomic landscape of pediatric and young adult T-lineage acute lymphoblastic leukemia, *Nature Genetics*,49(8):1211-1218 (2017)).



## Supplementary Figure S8

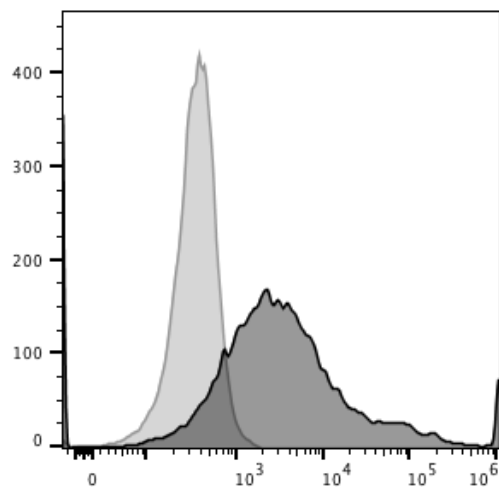

### Supplementary Figure S8. Surface expression of B2AR in reporter HEK293T cells

5xGAL4UAS-luciferase reporter HEK293T cells were transfected with the B2AR-NUB plasmid. Surface expression was analysed 48 hours post-transfection by FACS using a PE B2AR (R11E1) antibody. The histogram shows the B2AR<sup>+</sup> population (dark grey), as compared to the unstained population (light grey). The x axes shows the fluorescence in log scale and the y axes represents the cell count.

## Supplementary Figure S9

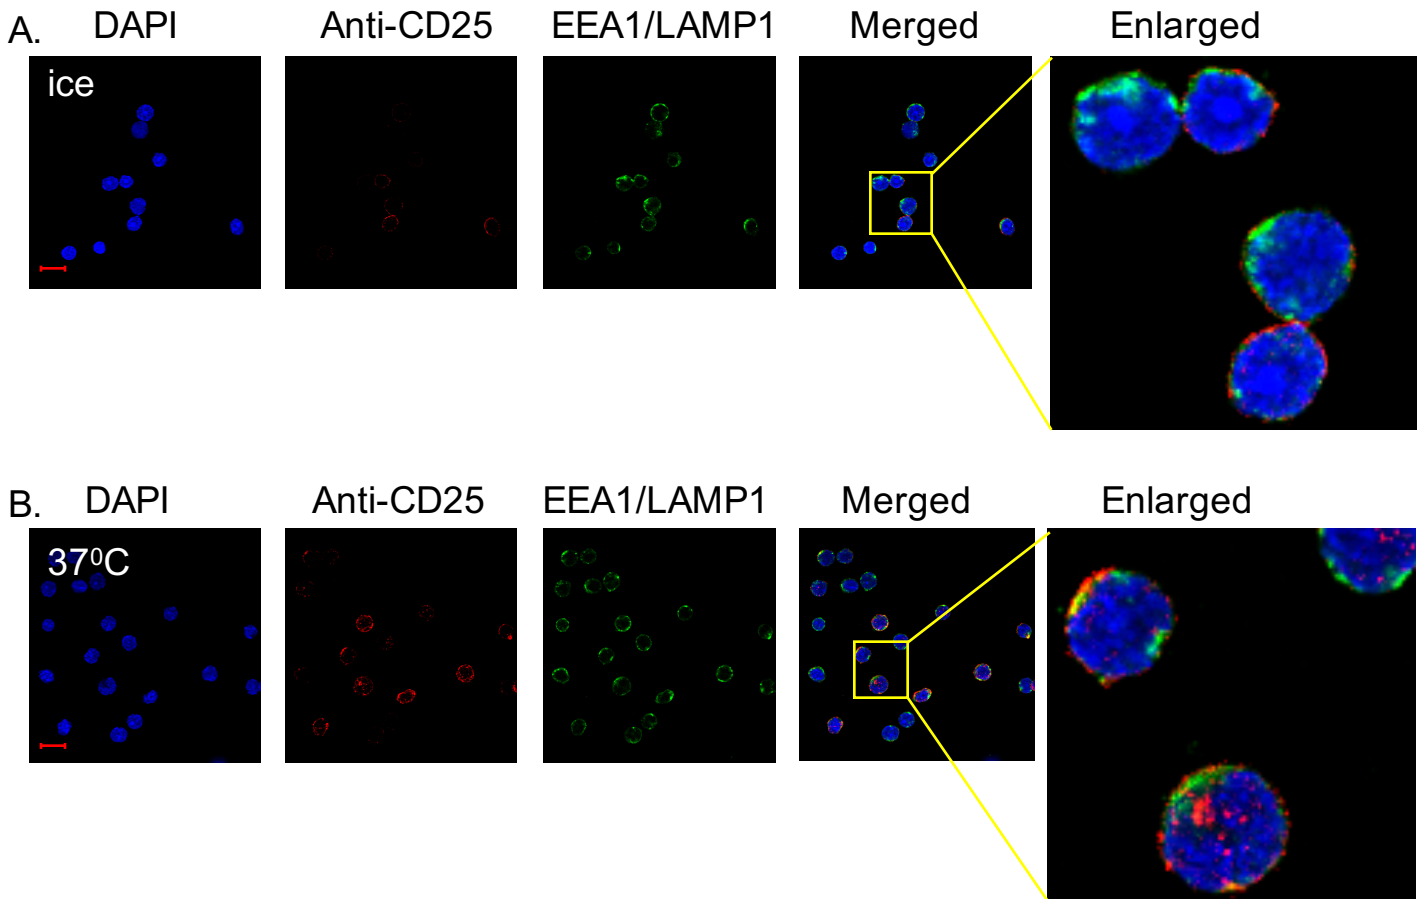

### Supplementary Figure S9. CD25 expression on thymocytes from Lck-Lmo2 mouse

A 28-week-old, female Lck-Lmo2 transgenic mouse thymus was removed and a single suspension prepared. The cells were stained with anti-CD25 antibody coupled to APC (red), with anti-EEA1 and anti-LAMP1 followed by anti-rabbit A488 secondary antibody (green), and with DAPI (blue). The cells were analyzed by confocal microscopy and images shown at x63 magnification except the right-hand panels were enlarged as indicated.

A. Five panels showing cells stained with antibody & incubated for 2.5 hours on ice.

B. Five panels showing cells stained with antibody & incubated for 30 minutes on ice and then 2 hours at 37°C

The scale bar of 10µm is shown on the DAPI stained images.

## Supplementary Figure S10. Sequence of surface marker cDNAs used for GFP complementation

DNA and amino acid sequences of the constructs used in the GFP complementation assay, internalisation (A-F) and MaMTH experiments are shown (G-H). In A-F the Gly-Ser linker regions between the antigen and GFP10/11 are shown in pink and the GFP10 and GFP11 sequences are shown in green and blue, respectively. The pEF-BOS expression vector (Invitrogen) was used. For the B2AR-NUB sequence the Gly-Ser linker region is shown in pink, the FLAG-tag in green and the NUB domain in blue (G). For the CD25-CUB-TF sequence the Gly-Ser linker region is shown in pink, the CUB domain in blue, the spacer in green and the GAL4 TF region in orange (H).

- A. Sequence of GPR56-10
- B. Sequence of CD7-10
- C. Sequence of CD53-10
- D. Sequence of CD25-11
- E. Sequence of GFP 1-9
- F. Sequence of B2AR-10
- G. Sequence of B2AR-NUB
- H. Sequence of CD25-CUB-TF

### A. Sequence of pEF-GPR56-G4S)3-GFP10

```
      10      20      30      40      50      60
CACGTGATGACTCCCCAGTCGCTGCTGCAGACGACACTGTTCCCTGCTGAGTCTGCTCTTC
GTGCACACTAGAGGGGTGAGCGACGACGCTCTGCTGTGACAAGGACACTCAGACGAGAAG
      M T P Q S L L Q T T L F L L S L L F

      70      80      90     100     110     120
CTGGTCCAAGGTGCCACGGCAGGGGGCCACAGGAAGACTTTTCGCTTTCGAGCCAGCGG
GACCAGGTTCCACGGGTGCCGTCGCCGTTCCCTTCTGAAAGCGAAGACGTCGGTCCGCC
      L V Q G A H G R G H R E D F R F C S Q R

      130     140     150     160     170     180
AACCAGACACACAGGAGCAGCCTCCACTACAAACCCACACCAGACCTGCGCATCTCCATC
TTGGTCTGTGTCTCCTCGTCGGAGGTGATGTTTGGGTGTGGTCTGGACCGGTAGAGGTAG
      N Q T H R S S L H Y K P T P D L R I S I

      190     200     210     220     230     240
GAGAACTCCGAAGAGGCCCTCACAGTCCATGCCCTTTCCCTGCAGCCACCCTGCTTCC
CTCTTGAGGCTTCTCCGGGAGTGTGTCAGGTACGGGAAAGGGACGTCGGGTGGGACGAAG
      E N S E E A L T V H A P F P A A H P A S

      250     260     270     280     290     300
CGATCCTTCCCTGACCCAGGGGCCTCTACCACTTCTGCCTCTACTGGAACCGACATGCT
GCTAGGAAGGGACTGGGGTCCCGGAGATGGTGAAGACGGAGATGACCTTGGCTGTACGA
      R S F P D P R G L Y H F C L Y W N R H A

      310     320     330     340     350     360
GGGAGATTACATCTTCTATGGCAAGCGTGACTTCTTGCTGAGTGACAAAGCCTCTAGC
CCCTCTAATGTAGAAGGATACCGTTTCGCACTGAAGAACGACTCACTGTTTCGGAGATCG
      G R L H L L Y G K R D F L L S D K A S S

      370     380     390     400     410     420
CTCCTCTGCTTCCAGCACCAGGAGAGAGCCTGGCTCAGGGCCCCCGCTGTTAGCCACT
GAGGAGACGAAGTCTGTTGCTCCTCTCGGACCGAGTCCCGGGGGCGACAATCGGTGA
      L L C F Q H Q E E S L A Q G P P L L A T

      430     440     450     460     470     480
TCTGTACCTCCTGGTGGAGCCCTCAGAACATCAGCCTGCCAGTGCCGCCAGCTTACC
AGACAGTGGAGGACCACCTCGGGAGTCTTGTAGTCGGACGGGTACGGCGGTGCAAGTGG
      S V T S W W S P Q N I S L P S A A S F T

      490     500     510     520     530     540
TTCTCCTTCCACAGTCTTCCACACGGCCGCTCACAATGCCTCGGTGGACATGTGCGAG
AAGAGGAAGGTGTCAGGAGGGGTGTGCCGCGAGTGTACGGAGCCACTGTACACGCTC
      F S F H S P P H T A A H N A S V D M C E
```

550 560 570 580 590 600  
CTCAAAAGGGACCTCCAGCTGCTCAGCCAGTTCTTGAAGCATCCCCAGAAGGCCTCAAGG  
GAGTTTTCCCTGGAGGTCGACGAGTCGGTCAAGGACTTCGTAGGGGCTTCCGGAGTTCC  
L K R D L Q L L S Q F L K H P Q K A S R

610 620 630 640 650 660  
AGGCCCTCGGCTGCCCCGCCAGCAGCTGCAGAGCCTGGAGTCGAAACTGACCTCT  
TCCGGGAGCCGACGGGGCGGTTCGGTCAACGTCTCGGACCTCAGCTTTGACTGGAGA  
R P S A A P A S Q Q L Q S L E S K L T S

670 680 690 700 710 720  
GTGAGATTTCATGGGGGACATGGTGTCTTCGAGGAGGACCGGATCAACGCCACGGTGTGG  
CACTCTAAGTACCCCTGTACCACAGGAAGCTCCTCCTGGCCTAGTTGCGGTGCCACACC  
V R F M G D M V S F E E D R I N A T V W

730 740 750 760 770 780  
AAGTCCAGCCACAGCCGGCCTCCAGGACCTGCACATCCACTCCCAGCAGGAGGAGGAG  
TTCGAGGTCGGGTGTTCGGCCGAGGTCCTGGAGCTGTAGGTGAGGGTTCCTCCTCCTC  
K L Q P T A G L Q D L H I H S Q Q E E E

790 800 810 820 830 840  
CAGAGCGAGATCATGGAGTACTCGGTGCTGCTGCCTCGAACACTCTTCCAGAGGACGAAA  
GTCTCGTCTAGTACCTCATGAGCCACGACGAGCTTGTGAGAAGGTCTCCTGCTTT  
Q S E I M E Y S V L L P R T L F Q R T K

850 860 870 880 890 900  
GGCCGGAGCGGGGAGGCTGAGAAGAGACTCCTCCTGGTGGACTTCAGCAGCCAAGCCCTG  
CCGGCCTCGCCCTCCGACTCTTCTCTGAGGAGGACCACCTGAAGTCGTCGGTTCGGGAC  
G R S G E A E K R L L L V D F S S Q A L

910 920 930 940 950 960  
TTCCAGGACAAGAACTCCAGCCAAGTCTGGGTGAGAAGGTCTTGGGGATTGTGGTACAG  
AAGTCTGTTCTTGGGTTCGTTTCAGGACCCACTCTTCCAGAACCCCTAACACCATGTC  
F Q D K N S S Q V L G E K V L G I V V Q

970 980 990 1000 1010 1020  
AACACCAAAGTAGCCAACCTCAGGAGCCCGTGGTGCCTCACCTTCCAGCACCAGCTACAG  
TTGTGGTTTCATCGGTTGGAGTGCCTCGGGCACCACGAGTGGAAAGGTCTGCTGATGTC  
N T K V A N L T E P V V L T F Q H Q L Q

1030 1040 1050 1060 1070 1080  
CCGAAGATGTGACTCTGCAATGTGTCTTGGGTTGAGACCCACATTTGAGCAGCCG  
GGCTTCTTACACTGAGACGTTACACACAAGACCCAACCTTCTGGGGTGTAACTCGTCGGGC  
P K N V T L Q C V F W V E D P T L S S P

1090 1100 1110 1120 1130 1140  
GGGCATTGGAGCAGTGTGGGTGTGAGACCGTCAGGAGAGAAACCCAAACATCCTGCTTC  
CCCGTAACCTCGTCACGACCCACACTTGGCAGTCTCTCTTTGGGTTGTAGGACGAAG  
G H W S S A G C E T V R R E T Q T S C F

1150 1160 1170 1180 1190 1200  
TGCAACCACTTGACCTACTTTGCAAGTGTGATGGTCTCCTCGGTGGAGGTGGACGCCGTG  
ACGTTGGTGAACGGATGAAACGTCACAACCTACCAGAGGAGCCACCTCCACCTGCGGCAC  
C N H L T Y F A V L M V S S V E V D A V

1210 1220 1230 1240 1250 1260  
CACAAAGCACTACTGAGCCTCCTCCTACGTGGGCTGTGTCTCTGCCCCTGGCCTG  
GTGTTTCGTGATGGACTCGGAGGAGAGGATGCACCCGACACAGCAGAGACGGGACCGGACG  
H K H Y L S L L S Y V G C V V S A L A C

1270 1280 1290 1300 1310 1320  
CTTGTCACCATTTGCCGCTACCTCTGCTCCAGGGTGGCCCTGCCGTGCAGGAGGAAACCT  
GAACAGTGGTAACGGCGGATGGAGACGAGGTCCACGGGACGGCAGCTCCTCCTTTGGA  
L V T I A A Y L C S R V P L P C R R K P

1330 1340 1350 1360 1370 1380  
CGGGACTACACCATCAAGGTGCACATGAACCTGCTGCTGGCCGCTCTTCTGCTGGACACG  
GCCCTGATGTGGTAGTTCCACGTGTACTTGGACGACGACCGGCAGAAGGACGACCTGTGC  
R D Y T I K V H M N L L L A V F L L D T>

1390 1400 1410 1420 1430 1440  
AGCTTCTGCTCAGCGAGCCGGTGGCCCTGACAGGCTCTGAGGCTGGCTGCCGAGCCAGT  
TCGAAGGACGAGTCGCTCGGCCACCGGACTGTCCGAGACTCCGACCGGACGGCTCGGTC  
S F L L S E P V A L T G S E A G C R A S

1450 1460 1470 1480 1490 1500  
 GCCATCTTCCTGCACCTTCTCCCTGCCTCACCTGCCTTTCTGGATGGGCCTCGAGGGGTAC  
 CCGTAGAAGGACGTGAAGAGGGACGAGTGGACGAAAGGACCTACCCGAGCTCCCCATG  
 A I F L H F S L L T C L S W M G L E G Y

1510 1520 1530 1540 1550 1560  
 AACCTTACCGACTCGTGGTGGAGGTCTTTGGCACCTATGTCCCTGGCTACCTACTCAAG  
 TTGGAGATGGCTGAGCACCACCTCCAGAAACCGTGGATACAGGGACCGATGGATGAGTTC  
 N L Y R L V V E V F G T Y V P G Y L L K

1570 1580 1590 1600 1610 1620  
 CTGAGCGCCATGGGCTGGGGCTTCCCATCTTTCTGGTGACGCTGGTGGCCCTGGTGGAT  
 GACTCGCGGTACCCGACCCGAGGGGTAGAAAGACCTGCGACCACCGGGACCACTA  
 L S A M G W G F P I F L V T L V A L V D>

1630 1640 1650 1660 1670 1680  
 GTGGACAACATATGGCCCATCATCTTGGCTGTGCATAGGACTCCAGAGGGCGTCATCTAC  
 CACCTGTTGATACCCGGGTAGTAGAACCGACACGTATCTGAGTCTCCCGCAGTAGATG  
 V D N Y G P I I L A V H R T P E G V I Y

1690 1700 1710 1720 1730 1740  
 CCTTCCATGTGCTGGATACGGGACTCCCTGGTCAGCTACATACCAACCTGGGCTCTTC  
 GGAAGGTACACGACCTATGCCCTGAGGGACCACTCGATGTAGTGGTTGGACCCGGAGAAG  
 P S M C W I R D S L V S Y I T N L G L F

1750 1760 1770 1780 1790 1800  
 AGCTGGTGTCTGTCAACATGGCCATGCTAGCCACCATGGTGGTGCAGATCCTGCGG  
 TCGGACCACAAAGACAAGTTGTACCGGTACGATCGGTGGTACCACCAGTCTAGGACGGC  
 S L V F L F N M A M L A T M V V Q I L R

1810 1820 1830 1840 1850 1860  
 CTGCGCCCCACACCCAAAAGTGGTACATGTGCTGACACTGTGGGCTCAGCCTGGT  
 GACGCGGGGTGTGGTCTTCCACAGTGTACAGACTGTGACGACCCGGAGTCCGGACCA  
 L R P H T Q K W S H V L T L L G L S L V

1870 1880 1890 1900 1910 1920  
 CTGGCCTGCCCTGGGCTTGTCTTCTCCTTTGCTTCTGGCACCTTCCAGCTTGTG  
 GAACCGGACGGGACCCGGAAGTGAAGAAGAGGAAACGAAGACCGTGGAAAGTCAACAG  
 L G L P W A L I F F S F A S G T F Q L V

1930 1940 1950 1960 1970 1980  
 GTCCTCTACCTTTTTCAGCATCATCACCTCCTTCCAAGGCTTCCCTCATCTTCATCTGGTAC  
 CAGGAGATGGAAAAGTCTAGTAGTGGAGGAAGGTTCCGAAGGAGTAGAAGTAGACCATG  
 V L Y L F S I I T S F Q G F L I F I W Y

1990 2000 2010 2020 2030 2040  
 TGGTCCATGCGGCTGCAGGCCCCGGGTGGCCCCCTCCCTCTGAAGAGCAACTCAGACAGC  
 ACCAGGTACGCCGACGTCGGGCCCCACCGGGGAGGGAGACTTCTCGTTGAGTCTGTG  
 W S M R L Q A R G G P S P L K S N S D S

2050 2060 2070 2080 2090 2100  
 GCCAGGCTCCCCATCAGCTCGGGCAGCACCTCGTCCAGCCGCATCCATATGGGCGGCGGA  
 CCGTCCGAGGGGTAGTCGAGCCGCTCGTGGAGCAGGTCGGCGTAGGTATACCCGCCGCT  
 A R L P I S S G S T S S S R I H M G G G

2110 2120 2130 2140 2150 2160  
 GGATCTGGGGCGGAGGAAGTGGGGGAGGGGCTCTCTCGAGGACCTGCCTGATGATCAC  
 CCTAGACCCCCCTCCTTACCCCCCTCCCCGAGAGAGCTCCTGGACGGACTACTAGTG  
 G S G G G G S G G G G S L E D L P D D H

2170 2180 2190 2200 2210  
 TATCTGTCTACACAGACAATCTGTCTAAGGATCTGAATGGGACCGACGTGTAA  
 ATAGACAGATGTGTCTGTTAGGACAGATTCCCTAGACTTACCCTGGCTGCACATT  
 Y L S T Q T I L S K D L N G T D V \*

## B. Sequence of pEF-CD7-(G4S)3-GFP10

10 20 30 40 50 60  
 CACGTGATGGCCGGGCTCCGAGGCTCCTGCTGCTGCCCTGCTTCTGGCGCTGGCTCGC  
 GTGCACTACCGCCCGGAGGCTCCGAGGACGACGACGGGGACGAAGACCGCGACCGAGCG  
 M A G P P R L L L P L L L A L A R

70 80 90 100 110 120  
 GGCTGCCTGGGGCCCTGGCTGCCCAAGAGGTGCAGCAGTCTCCCACTGCACGACTGTC  
 CCGGACGGACCCCGGACCGGGTCTCCAGTCTGACAGGGGGTACGCTGCTGACAG  
 G L P G A L A A Q E V Q Q S P H C T T V

130            140            150            160            170            180  
 CCGTGGGAGCCTCCGTCAACATCACCTGCTCCACCAGCGGGGGCCTGCGTGGGATCTAC  
 GGGACCCCTCGAGGCAGTTGTAGTGGACGAGGTGGTCGCCCCGGACGCACCCTAGATG  
 P V G A S V N I T C S T S G G L R G I Y  
  
 190            200            210            220            230            240  
 CTGAGGCAGCTCGGGCCACAGCCCAAGACATCATTTACTACGAGGACGGGGTGGTGCCC  
 GACTCCGTGAGCCCGTGTGCGGGTCTGTAGTAAATGATGCTCCTGCCCCACCACGGG  
 L R Q L G P Q P Q D I I Y Y E D G V V P  
  
 250            260            270            280            290            300  
 ACTACGGACAGACGGTTCGGGGCCGCATCGACTTCTCAGGGTCCCAGGACAACCTGACT  
 TGATGCCTGTCTGCCAAGGCCCGCGCTAGCTGAAGAGTCCCAGGGTCTGTTGGACTGA  
 T T D R R F R G R I D F S G S Q D N L T  
  
 310            320            330            340            350            360  
 ATCACCATGCACCGCCTGCAGCTGTGCGGACACTGGCACCTACACCTGCCAGGCCATCAGC  
 TAGTGGTACGTGGCGGACGTGCGACAGCCTGTGACCGTGGATGTGGACGGTCCGGTAGTGC  
 I T M H R L Q L S D T G T Y T C Q A I T  
  
 370            380            390            400            410            420  
 GAGGTCAATGTCTACGGCTCCGGCACCTGGTCTGGTGACAGAGGAACAGTCCCAAGGA  
 CTCCAGTTACAGATGCCGAGGCCGTGGGACCAGGACCCTGTCTCCTTGTGACGGTTCCT  
 E V N V Y G S G T L V L V T E E Q S Q G  
  
 430            440            450            460            470            480  
 TGGCACAGATGCTCGGACGCCCCACCAAGGGCCTCTGCCCTCCCTGCCCCACCGACAGGC  
 ACCGTGTCTACGAGCCTGCGGGGTGGTTCGGGAGACGGGAGGACGGGGTGGCTGTCCG  
 W H R C S D A P P R A S A L P A P P T G  
  
 490            500            510            520            530            540  
 TCCGCCCTCCCTGACCCGACAGACGCCTCTGCCCTCCCTGACCCGCCAGCAGCCTCTGCC  
 AGGCGGAGGGACTGGGCGTCTGTGCGGAGACGGGAGGACTGGGCGGTGCTCGGAGACGG  
 S A L P D P Q T A S A L P D P P A A S A  
  
 550            560            570            580            590            600  
 CTCCCTGCGGCCTGGCGGTGATCTCCTTCCTCCTCGGGCTGGGCCTGGGGGTGGCGTGT  
 GAGGGACCGGGACCGCCACTAGAGGAAGGAGGACCCGACCCCGACCCCAACCGACA  
 L P A A L A V I S F L L G L G L G V A C  
  
 610            620            630            640            650            660  
 GTGCTGGCGAGGACACAGATAAAGAACTGTGCTCGTGGCGGGATAAGAAGTCCGGCGCA  
 CACGACCGCTCCTGTGTCTATTTCTTTGACACGAGCACCGCCCTATTCTTGAGCCCGCT  
 V L A R T Q I K K L C S W R D K N S A A  
  
 670            680            690            700            710            720  
 TGTGTGGTGTACGAGGACATGTGCGACAGCCGCTGCAACACGCTGTCTCCCCAACCCAG  
 ACACACCACATGCTCCTGTACAGCGTGTGCGGACGTTGTGCGACAGGAGGGGGTGGTTC  
 C V V Y E D M S H S R C N T L S S P N Q  
  
 730            740            750            760            770            780  
 TACCAGTTCGAGGGCGGCGGAGGATCTGGGGCGGAGGAAGTGGGGAGGGGGCTTTTC  
 ATGGTCCAGCTCCCGCCCTCCTAGACCCCCGCTCCTTACCCCCCTCCCCGAGAAAG  
 Y Q V E G G G G S G G G G S G G G G S F  
  
 790            800            810            820            830            840  
 GAGGACCTGCCTGATGATCACTATCTGTCTACACAGACAATCCTGTCTAAGGATCTGAAT  
 CTCTGGACGGACTACTAGTGTAGACAGATGTGTCTGTTAGGACAGATTCTTAGACTTA  
 E D L P D D H Y L S T Q T I L S K D L N  
  
 850  
 GGGACCGACGTGTAA  
 CCCTGGCTGCACATT  
 G T D V \*

### C. Sequence of pEF-CD53-(G4S)3-GFP10

10            20            30            40            50            60  
 CACGTGATGGGCATGAGTAGCTTGAACTGCTGAAGTATGTCCTGTTTTTCTTCAACTG  
 GTGCACTACCCGTACTCATCGAAGTTTGGACACTTCATACAGGACAAAAAGAAGTTGAAC  
 M G M S S L K L L K Y V L F F F N L  
  
 70            80            90            100            110            120  
 CTCTTTTGGATCTGTGGCTGCTGCATTTTGGGCTTTGGGATCTACCTGCTGATCCACAAC  
 GAGAAAACCTAGACACCGACGACGTAACCCGAAACCTAGATGGACGACTAGGTGTTG  
 L F W I C G C C I L G F G I Y L L I H N

130            140            150            160            170            180  
 AACTTCGGAGTGTCTTCCATAACCTCCCCTCCCTCACGCTGGGCAATGTGTTTGTCAATC  
 TTGAAGCCTCACGAGAAGGTATTGGAGGGGAGGGAGTGCACCCGTTACACAAACAGTAG  
 N F G V L F H N L P S L T L G N V F V I

190            200            210            220            230            240  
 GTGGGCTCTATTATCATGGTAGTTGCCCTCCTGGGCTGCATGGGCTCTATCAAGGAAAAC  
 CACCCGAGATAATAGTACCATCAACGGAAGGACCCGACGTACCCGAGATAGTTCTTTTG  
 V G S I I M V V A F L G C M G S I K E N>

250            260            270            280            290            300  
 AAGTGTCTGCTTATGTCTGTTCTTCATCCTGCTGCTGATTATCCTCCTTGTCTGAGGTGACC  
 TTCACAGACGAATACAGCAAGAAGTAGGACGACGACTAATAGGAGGAACGACTCCACTGG  
 K C L L M S F F I L L L I I L L A E V T

310            320            330            340            350            360  
 TTGGCCATCCTGCTCTTTGTATATGAACAGAAGCTGAATGAGTATGTGGCTAAGGGTCTG  
 AACCGGTAGGACGAGAAACATATACTTGTCTTCGACTTACTCATACACCGATTCCAGAC  
 L A I L L F V Y E Q K L N E Y V A K G L

370            380            390            400            410            420  
 ACCGACAGCATCCACCGTTACCACTCAGACAATAGCACCAGGAGCGTGGGACTCCATC  
 TGGCTGTCTGAGGTGGCAATGGTGAGTCTGTTATCGTGGTCCGTCGCACCCCTGAGGTAG  
 T D S I H R Y H S D N S T K A A W D S I

430            440            450            460            470            480  
 CAGTCAATTTCTGCAGTGTGTGGTATAAATGGCACGAGTGATTGGACCAGTGGCCACCA  
 GTCAGTAAAGACGTCACAACACCATATTTACCGTGTCTACTAACCTGGTCAACCGGGTGGT  
 Q S F L Q C C G I N G T S D W T S G P P

490            500            510            520            530            540  
 GCATCTTGGCCCTCAGATCGAAAAGTGGAGGGTGTCTATGCGAAAAGCAAGACTGTGGTTT  
 CGTAGAACGGGAGTCTAGCTTTTACCTCCCAACGATACGCTTTTCGTTCTGACACCAAA  
 A S C P S D R K V E G C Y A K A R L W F

550            560            570            580            590            600  
 CATTCCAATTTCTGTATATCGGAATCATCACCATCTGTGTATGTGTGATTGAGGTGTG  
 GTAAGGTAAAGGACATATAGCCTTAGTAGTGGTAGACACATACACTAACCCACAAC  
 H S N F L Y I G I I T I C V C V I E V L

610            620            630            640            650            660  
 GGGATGTCTTTGCACTGACCCGAACTGCCAGATTGACAAAACCAGCCAGACCATAGGG  
 CCTACAGGAAACGTGACTGGGACTTGACGGTCTAACGTTTTGGTTCGGTCTGTTATCCC  
 G M S F A L T L N C Q I D K T S Q T I G

670            680            690            700            710            720  
 CTACATATGGGCGGGGAGGATCTGGGGGGGAGGAAGTGGGGGAGGGGCTCTCTCGAG  
 GATGTATACCCCGCCCTCCTAGACCCCGCCCTCCTTACCCCTCCCGGAGAGAGCTC  
 L H M G G G G S G G G G S G G G G S L E

730            740            750            760            770            780  
 GACCTGCTGATGATCACTATCTGTCTACACAGACAATCCTGTCTAAGGATCTGAATGG  
 CTGGACGGACTACTAGTATAGACAGATGTGTCTGTTAGGACAGATTCTTAGACTTACCC  
 D L P D D H Y L S T Q T I L S K D L N G

790  
 ACCGACGTGTA  
 TGGCTGCACATT  
 T D V \*

#### D. Sequence of pEF-CD25-(G4S)3-GFP11

10            20            30            40            50            60  
 CACGTGATGAGTATGGATTACACCTGCTGATGTGGGACTGCTCACGTTTCATCATGGTG  
 GTGCACTACTCATACCTAAGTATGGACGACTACACCCCTGACGAGTGAAGTAGTACCAC  
 M S M D S Y L L M W G L L T F I M V

70            80            90            100            110            120  
 CCTGGCTGCCAGGCAGAACTCTGTGACGATGACCCGCGAGAGATCCACACGCCACATTC  
 GGACCGACGGTCCGTCTTGAGACACTGTACTGGGCGGTCTCTAGGGTGTGCGGTGTAAG  
 P G C Q A E L C D D D P P E I P H A T F

130            140            150            160            170            180  
 AAAGCCATGGCCTACAAGGAAGGAACCATGTTGAACTGTGAATGCAAGAGAGGTTTCCCG  
 TTTCCGTACCGGATGTTCCCTTGGTACAACCTTGACACTTACGTTCTCTCCAAAGGCG  
 K A M A Y K E G T M L N C E C K R G F R

190            200            210            220            230            240  
 AGAATAAAAAGCGGGTCACTCTATATGCTCTGTACAGGAACTCTAGCCACTCGTCTGG  
 CTTTATTTTTCGCCAGTGAGATATACGAGACATGTCCTTTGAGATCGGTGAGCAGGAC  
 R I K S G S L Y M L C T G N S S H S S W

250            260            270            280            290            300  
 GACAACCAATGTCAATGCACAAGCTCTGCCACTCGGAACACAACGAAACAAGTGACACCT  
 CTGTTGGTTACAGTTACGTGTTTCGAGACGGTGAGCCTTGTGTTGCTTTGTTCACTGTGGA  
 D N Q C Q C T S S A T R N T T K Q V T P

310            320            330            340            350            360  
 CAACCTGAAGAACAGAAAGAAAGAAAACCACAGAAATGCAAAGTCCAATGCAGCCAGTG  
 GTTGGACTTCTTGTCTTTCTTTTCTTTTGGTGTCTTTTACGTTTCAGGTTACGTCCGTAC  
 Q P E E Q K E R K T T E M Q S P M Q P V

370            380            390            400            410            420  
 GACCAAGCGAGCCTTCCAGGTCAGTGCAGGGAACCTCCACCATGGGAAAATGAAGCCACA  
 CTGGTTCGCTCGGAAGTCCAGTGACGTCCCTTGGAGGTGGTACCCTTTTACTTCGGTGT  
 D Q A S L P G H C R E P P P W E N E A T

430            440            450            460            470            480  
 GAGAGAATTTATCATTTCGTGGTGGGGCAGATGGTTTATATCAGTGCCTCCAGGGATAC  
 CTCTCTAAATAGTAAAGCACCACCCCGTCTACCAAATAATAGTCACGCAGGTCCTATG  
 E R I Y H F V V G Q M V Y Y Q C V Q G Y

490            500            510            520            530            540  
 AGGGCTCTACACAGAGGTCCTGTGAGAGCGTCTGCAAATGACCCACGGGAAGACAAGG  
 TCCCAGATGTGTCTCCAGGACGACTCTCGCAGACGTTTACTGGGTGCCCTTCTGTTC  
 R A L H R G P A E S V C K M T H G K T R

550            560            570            580            590            600  
 TGGACCCAGCCCAGCTCATATGCACAGGTGAAATGGAGACCAGTCAGTTTCCAGGTGAA  
 ACCTGGGTTCGGGGTCGAGTATACGTGTCCACTTTACCCTCTGGTCAGTCAAAGTCCACT  
 W T Q P Q L I C T G E M E T S Q F P G E

610            620            630            640            650            660  
 GAGAAGCCTCAGGCAAGCCCCGAAGGCGTCCGAGAGTGAGACTTCCTGCCTCGTCACA  
 CTCTTCGGAGTCCGTTCCGGGCTTCCGGCAGGACTCTCACTCTGAAGGACGGAGCAGTGT  
 E K P Q A S P E G R P E S E T S C L V T

670            680            690            700            710            720  
 ACAACAGATTTTCAAATACAGACAGAAATGGCTGCAACCATGGAGACGTCCATATTTACA  
 TGTGTCTAAAAGTTTATGTCTGTCTTTACCGACGTTGGTACCTCTGCAGGTATAAATGT  
 T T D F Q I Q T E M A A T M E T S I F T

730            740            750            760            770            780  
 ACAGAGTACCAGGTAGCAGTGGCCGGCTGTGTTTCTCTGCTGATCAGCGTCCCTCCTCTG  
 TGTCTCATGGTCCATCGTCCACCGCCGACACAAAAGGACGACTAGTCGCAGGAGGAGGAC  
 T E Y Q V A V A G C V F L L I S V L L L

790            800            810            820            830            840  
 AGTGGGCTCACCTGGCAGCGGAGACAGAGGAAGAGTAGAAGAACAATCTCCAGAGGCGGC  
 TCACCCGAGTGGACCGTCCCTCTGTCTCCTTCTCATCTTGTGTTAGAGGTCTCCGCCG  
 S G L T W Q R R Q R K S R R T I S R G G

850            860            870            880            890            900  
 GGAGGATCTGGGGGCGGAGGAAGTGGGGGAGGGGCTCTGCGGCCGCCACCAGCGAGAAG  
 CCTCCTAGACCCCGCTCCTTACCCCTCCCCGAGACGCCGGCGGTGGTGCCTCTTC  
 G G S G G G S G G G S A A A T S E K

910            920            930            940            950            960  
 CGGGATCATATGGTGTCTGTTGAATACGTGACCGCGCTGGCATCACCGACGCCAGCTAA  
 GCCCTAGTATACCACGACGACCTTATGCACCTGGCGGCGACCGTAGTGGCTGCGGTCTGAT  
 R D H M V L L E Y V T A A G I T D A S \*

## E. Sequence of pEF-GFP1-9

10            20            30            40            50            60  
 CACGTGATGAGGAAGGGCGAGGAAGTGTTCACCGCGTGGTGCCATCCTGATCGAGCTG  
 TGCACACTCCTTCCCGCTCCTTGACAAGTGGCCGCCACCACGGTAGGACTAGCTCGAC  
 M R K G E E L F T G V V P I L I E L

70            80            90            100            110            120  
 GATGGCGACGTGAACGGCCACAAGTTCCTCGTGGGGGAGAGGGCGAAGGCGACGCCACA  
 CTACCGTGCACCTTCCCGGTGTTCAAGAAGCACGCCCTCTCCCGCTTCCGCTGCGGTGT  
 D G D V N G H K F F V R G E G E G D A T



130            140            150            160            170            180  
 ATCGGAAAGCTGAGCCTGAAGTTCATCTGCACCACCGCAAGCTGCCCGTGCCTTGGCCT  
 TAGCCTTTGACTCGGACTTCAAGTAGACGTGGTGGCCGTTTCGACGGGCACGGAACCGGA  
 I G K L S L K F I C T T G K L P V P W P  
  
 190            200            210            220            230            240  
 ACCCTCGTGACCACACTGACCTACGGCGTGCAGTGCCTCAGCAGATACCCCGACCATATG  
 TGGGAGCACTGGTGTGACTGGATGCCGCACGTACGAAAGTCGTCTATGGGGCTGGTATAC  
 T L V T T L T Y G V Q C F S R Y P D H M  
  
 250            260            270            280            290            300  
 AAGCGGCACGACTTCTTCAAGAGCGCCATGCCCGAGGGCTACGTGCAGGAACGGACCATC  
 TTCGCCGTGCTGAAGAAGTTCTCGCGGTACGGGCTCCCGATGCACGTCCTTGCCTGGTAG  
 K R H D F F K S A M P E G Y V Q E R T I  
  
 310            320            330            340            350            360  
 TACTTCAAGGACGACGGCACCTACAAGACCAGAGCCGAAGTGAAGTTCGAGGGCGACACC  
 ATGAAGTTCCTGCTGCCGTGGATGTTCTGGTCTCGGCTTCACTTCAAGCTCCCGCTGTGG  
 Y F K D D G T Y K T R A E V K F E G D T  
  
 370            380            390            400            410            420  
 CTCGTGAACCGGATCGAGCTGAAGGGCATCGACTTCAAAGAGGATGGCAACATCCTGGGC  
 GAGCACTTGGCCTAGCTCGACTTCCCGTAGCTGAAGTTTCTCCTACCGTGTAGGACCCG  
 L V N R I E L K G I D F K E D G N I L G  
  
 430            440            450            460            470            480  
 CACAAGCTGGAGTACAACCTTCAACAGCCACAAGGTGTACATCACCGCCGACAAGCAGAAC  
 GTGTTCCGACCTCATGTTGAAGTGTTCGGTGTTCACATGTAGTGGCGGCTGTTCTGCTTG  
 H K L E Y N F N S H K V Y I T A D K Q N  
  
 490            500            510            520            530            540  
 AACGGCATCAAGGCCAACTTACCATCCGGCACAACGTGGAAGATGGCAGCGTGCAGCTG  
 TTGCCGTAGTTCGGTGAAGTGGTAGGCCGTGTTGCACCTTCTACCGTCGCACGTCGAC  
 N G I K A N F T I R H N V E D G S V Q L  
  
 550            560            570            580            590  
 GCGGACCACTACCAGCAGAACACCCCATCGGAGATGGCCCCGTGCTGCTGCCTTAA  
 CCGCTGGTGATGGTCTTGTGGGGTAGCCTTACCGGGGCACGACGACGGAATT  
 A D H Y Q Q N T P I G D G P V L L P \*

**F. pEF-B2AR-(G4S)3-GFP10**

10            20            30            40            50            60  
 ATGGGGCAACCCGGGAACGGCAGCGCCTTCTTGCTGGCACCCAATGGAAGCCATGCGCCG  
 TACCCCGTTGGGCCCTTGCCGTCGCGGAAGAACGACCGTGGGTTACCTTCGGTACGCGCG  
 M G Q P G N G S A F L L A P N G S H A P  
  
 70            80            90            100            110            120  
 GACCACGACGTCACGCAGGAAAGGGACGAGGTGTGGGTGGTGGGCATGGGCATCGTCATG  
 CTGGTGTGCTCAGTGCCTTTCCTGCTCCACACCCACCCCGTACCCGTAGCAGTAC  
 D H D V T Q E R D E V W V V G M G I V M  
  
 130            140            150            160            170            180  
 TCTCTCATCGTCTGGCCATCGTGTGGCAATGTGCTGGTGCATCACAGCCATGGCCAAG  
 AGAGAGTAGCAGGACCGGTAGCACAAACCGTTACACGACCAAGTAGTGTGCGGTAACGGTTC  
 S L I V L A I V F G N V L V I T A I A K  
  
 190            200            210            220            230            240  
 TTCGAGCGTCTGCAGACGGTCACCAACTACTTCACTCACTTCACTGGCCTGTGCTGATCTG  
 AAGCTCGCAGACGCTGCCAGTGGTTGATGAAGTAGTGAAGTGACCGGACACGACTAGAC  
 F E R L Q T V T N Y F I T S L A C A D L  
  
 250            260            270            280            290            300  
 GTCATGGGCTGGCAGTGGTGCCTTTGGGGCCGCCATATCTTATGAAAATGTGGACT  
 CAGTACCCGGACCGTCACCACGGGAAACCCGGCGGATATAAGAACTACTTTACACCTGA  
 V M G L A V V P F G A A H I L M K M W T  
  
 310            320            330            340            350            360  
 TTTGGCAACTTCTGGTGGAGTTTGGACTTCCATTGATGTGCTGTGCGTCACGGCCAGC  
 AAACCGTTGAAGACCACGCTCAAAACCTGAAGGTAACACACGACACGCAAGTGGCGGTCG  
 F G N F W C E F W T S I D V L C V T A S  
  
 370            380            390            400            410            420  
 ATTGAGACCCTGTGCGTGTGCGAGTGGATCGCTACTTTGCCATTACTTACCTTTCAAG  
 TAACTCTGGGACACGCACTAGCGTACCTAGCGATGAAACGGTAATGAAGTGGAAGTTTC  
 I E T L C V I A V D R Y F A I T S P F K

430 440 450 460 470 480  
TACCAGAGCTGCTGACCAAGAATAAGGCCGGGTGATCATCTGATGGTGTGGATTGTG  
ATGGTCTCGGACGACTGGTTCTTATTCCGGGCCACTAGTAAGACTACCACACCTAACAC  
Y Q S L L T K N K A R V I I L M V W I V

490 500 510 520 530 540  
TCAGGCCTTACCTCCTTCTTGCCCATTCAGATGCACTGGTACCGGGCCACCCACCAGGAA  
AGTCCGGAATGGAGGAAGAACGGGTAAGTCTACGTGACCATGGCCCGGTGGTGGTCCCTT  
S G L T S F L P I Q M H W Y R A T H Q E

550 560 570 580 590 600  
GCCATCAACTGCTATGCCAATGAGACCTGCTGTGACTTCTTCACGAACCAAGCCTATGCC  
CGGTAGTTGACGATACGGTACTCTGGACGACACTGAAGAAGTGTGGTTCGGATACGG  
A I N C Y A N E T C C D F F T N Q A Y A

610 620 630 640 650 660  
ATTGCCTCTTCCATCGTGTCTTCTACGTTCCCTGGTGATCATGGTCTTCTGCTACTCC  
TAACGGAGAAGGTAGCACAGGAAGATGCAAGGGGACCACCTAGTACCAGAAGCAGATGAGG  
I A S S I V S F Y V P L V I M V F V Y S

670 680 690 700 710 720  
AGGGTCTTTTCCAGGAGGCCAAAAGGCAGCTCCAGAAGATTGACAAAATCTGAGGGCCGCTTC  
TCCAGAAAAGTCTCCGGTTTCCGTCGAGGTCTTCTAACTGTTTAGACTCCCGCGAAG  
R V F Q E A K R Q L Q K I D K S E G R F

730 740 750 760 770 780  
CATGTCCAGAACCTTAGCCAGGTGGAGCAGGATGGGCGGACGGGGCATGGACTCCGCAGA  
GTACAGGCTTGGAAATCGGTCCACCTCGTCTACCGCCTGCCCGTACCTGAGGCGTCT  
H V Q N L S Q V E Q D G R T G H G L R R

790 800 810 820 830 840  
TCTTCCAAGTTCTGCTTGAAGGAGCACAAAGCCCTCAAGACGTTAGGCATCATATGGGC  
AGAAGGTTCAAGACGAACCTTCTCGTGTTCGGGAGTTCTGCAATCCGTAGTAGTACCCG  
S S K F C L K E H K A L K T L G I I M G

850 860 870 880 890 900  
ACTTTCACCTCTGCTGGCTGCCCTTCTTCATCGTTAACATTGTGCATGTGATCCAGGAT  
TGAAAAGTGGGAGACGACCGGAGGAAGTAGCAATTGTAACACGTACACTAGGTCCCTA  
T F T L C W L P F F I V N I V H V I Q D

910 920 930 940 950 960  
AACCTCATCCGTAAGGAAGTTTACATCCTCCTAAATGGATAGGCTATGTCAATTCTGGT  
TTGGAGTAGGCATTCCTTCAAATGTAGGAGGATTAACCTATCCGATACAGTTAAGACCA  
N L I R K E V Y I L L N W I G Y V N S G

970 980 990 1000 1010 1020  
TTCAATCCCCTTATCTACTGCCGGAGCCAGATTTCCAGGATTGCCCTCCAGGAGCTTCTG  
AAGTTAGGGGAATAGATGACGGCCTCGGGTCTAAAGTCTAACGGAAGGTCTCGAAGAC  
F N P L I Y C R S P D F R I A F Q E L L

1030 1040 1050 1060 1070 1080  
TGCTGCGCAGGCTTCTTGAAGGCCTATGGGAATGGCTACTCCAGCAACGGCAACACA  
ACGGACCGTCCAGAAGAACTTCCGGATACCTTACCGATGAGGTCGTTGCCGTTGTGT  
C L R R S S L K A Y G N G Y S S N G N T

1090 1100 1110 1120 1130 1140  
GGGAGCAGAGTGGATATCACGTGGAACAGGAGAAAATAAACTGCTGTGTGAAGAC  
CCCTCGTCTCACCTATAGTGCACCTTGTCTCTTCTTTTATTGACGACACACTTCTG  
G E Q S G Y H V E Q E K E N K L L C E D

1150 1160 1170 1180 1190 1200  
CTCCAGGCACGGAAGACTTTGTGGGCCATCAAGTACTGTGCCCTAGCGATAACATGAT  
GAGGGTCCGTGCCCTTCTGAAAACCCGGTAGTTCCATGACACGGATCGCTATTGTAAC  
L P G T E D F V G H Q G T V P S D N I D

1210 1220 1230 1240 1250 1260  
TCACAAGGGAGGAATTGTAGTACAAATGACTCACTGCTGGTFCGACGGCGGGGAGGATCT  
AGTGTTCCTCCTTAACATCATGTTACTGAGTGACGACAGCTGCCGCCCTCCTAGAA  
S Q G R N C S T N D S L L V D G G G G S

1270 1280 1290 1300 1310 1320  
GGGGCGGAGGAAGTGGGGGAGGGGCTCTCTCGAGGACCTGCCCTGATGATCACTATCTG  
CCCCCGCTCCTTACCCCTCCCCGAGAGACTCCTGGACGGACTACTAGTGATAGAC  
G G G G S G G G G G S L E D L P D D H Y L

1330            1340            1350            1360  
TCTACACAGACAATCCTGTCTAAGGATCTGAATGGGACCGACGTGTAA  
AGATGTGTCTGTTAGGACAGATTCTAGACTTACCTGGCTGCACATT  
S T Q T I L S K D L N G T D V \*

## G. Sequence of B2AR-NUB

10            20            30            40            50            60  
ATGGGGCAACCCGGGAACGGCAGCGCCTTCTTGCTGGCACCCAATGGAAGCCATGCGCCG  
TACCCCGTTGGGCCCTTGCCGTCGCGGAAGAACGACCGTGGGTTACCTTCGGTACGCGCG  
M G Q P G N G S A F L L A P N G S H A P

70            80            90            100           110           120  
GACCACGACGTCACGCAGGAAAGGGACGAGGTGTGGGTGGTGGGCATGGGCATCGTCATG  
CTGGTGCTGCAGTGCCTTTCCCTGCTCCACACCCACCACCCGTACCCGTAGCAGTAC  
D H D V T Q E R D E V W V V G M G I V M

130           140           150           160           170           180  
TCTCTCATCGTCCCTGGCCATCGTGTGGCAATGTGCTGGTCATCACAGCCATTGCCAAG  
AGAGAGTAGCAGGACCGGTAGCACAAACCGTTACACGACCAGTAGTGTCCGTAACGGTTC  
S L I V L A I V F G N V L V I T A I A K

190           200           210           220           230           240  
TTCGAGCGTGCAGACGGTCACCAACTACTTTCATCACTTCACTGGCCTGTGCTGATCTG  
AAGCTCGCAGACGCTGCCAGTGGTTGATGAAGTAGTGAAGTGACCGGACACGACTAGAC  
F E R L Q T V T N Y F I T S L A C A D L

250           260           270           280           290           300  
GTCATGGGCCTGGCAGTGGTGCCTTTGGGGCCGCCATATTCTTATGAAAATGTGGACT  
CAGTACCCCGACCGTCACCACGGGAAACCCGGCGGGTATAAGAATACTTTACACCTGA  
V M G L A V V P F G A A H I L M K M W T

310           320           330           340           350           360  
TTTGGCAACTTCTGGTGCAGTTTTGGACTTCCATTGATGTGCTGTGCGTCACGGCCAGC  
AAACCGTTGAAGACCACGCTCAAACCTGAAGGTAACACACGACCGCAGTGCCTGGTTCG  
F G N F W C E F W T S I D V L C V T A S

370           380           390           400           410           420  
ATTGAGACCTGTGCGTGCAGTGGATCGCTACTTTGCCATTACTTCCACCTTTCAAG  
TAACTCTGGGACACGCACAGCGTACCTAGCGATGAAACGGTAATGAAGTGAAAAGTTC  
I E T L C V I A V D R Y F A I T S P F K

430           440           450           460           470           480  
TACCAGAGCCTGCTGACCAAGAATAAGGCCCGGGTGATCATTCTGATGGTGTGGATTGTG  
ATGGTCTCGGACGACTGGTTCTTATTCGGGCCACTAGTAAGACTACCACACCTAACAC  
Y Q S L L T K N K A R V I I L M V W I V

490           500           510           520           530           540  
TCAGGCCTTACCTCCTTCTGCCCCATTGATGCAGTGGTACCGGGCCACCACCAGGAA  
AGTCCGGAATGGAGGAAGAACGGGTAAGTCTACGTGACCATGGCCCGGTGGGTGGTCTT  
S G L T S F L P I Q M H W Y R A T H Q E

550           560           570           580           590           600  
GCCATCAACTGCTATGCCAATGAGACCTGTGACTTCTTACGAACCAAGCCTATGCC  
CGGTAGTTGACGATACGGTACTTGGACGACACTGAAGAAGTGTGGTTCGGATACGG  
A I N C Y A N E T C C D F F T N Q A Y A

610           620           630           640           650           660  
ATTGCCTCTTCCATCGTGTCTTCTACGTTCCCTGGTGATCATGGTCTTCGTCTACTCC  
TAACGGAGAAGGTAGCACAGGAAGATGCAAGGGGACCCTAGTACCAGAAGCAGATGAGG  
I A S S I V S F Y V P L V I M V F V Y S

670           680           690           700           710           720  
AGGGTCTTTCAGGAGGCCAAAAGGCAGCTCCAGAAGATTGACAAATCTGAGGGCCGCTTC  
TCCAGAAAGTCTCCGGTTTTCCGTCGAGGTCTTCTAACTGTTTACTTCCCGGCGAAG  
R V F Q E A K R Q L Q K I D K S E G R F

730           740           750           760           770           780  
CATGTCCAGAACCTTAGCCAGGTGGAGCAGGATGGGCGGACGGGCATGGACTCCGCAGA  
GTACAGGTCTTGAATCGGTCCACCTCGTCTTACCGCCTGCCCGTACCTGAGGCGTCT  
H V Q N L S Q V E Q D G R T G H G L R R

790           800           810           820           830           840  
TCTTCCAAGTCTGCTTGAAGGAGCACAAGCCCTCAAGACGTTAGGCATCATCATGGGC  
AGAAGGTTCAAGACGAACCTCCTCGTGTTCGGGAGTTCGCAATCCGTAGTAGTACCCG  
S S K F C L K E H K A L K T L G I I M G

850 860 870 880 890 900  
 ACTTTCACCCCTCTGCTGGCTGCCCTTCTTCATCGTTAACATTTGTGCATGTGATCCAGGAT  
 TGAAAGTGGGAGACGACCGACGGGAAGAAGTAGCAATTTGTAACACGTACACTAGGTCCTA  
 T F T L C W L P F F I V N I V H V I Q D

910 920 930 940 950 960  
 AACCTCATCCGTAAGGAAGTTTACATCCTCCTAAATTTGGATAGGCTATGTCAATTTCTGGT  
 TTGGAGTAGGCATTCCTTCAAATGTAGGAGGATTTAACCTATCCGATACAGTTAAGACCA  
 N L I R K E V Y I L L N W I G Y V N S G

970 980 990 1000 1010 1020  
 TTCAATCCCCTTATCTACTGCCGGAGCCCAGATTTTCAGGATTTGCCCTTCCAGGAGCTTCTG  
 AAGTTAGGGGAATAGATGACGGCCTCGGGTCTAAAGTCTAACGGAAGGTCCTCGAAGAC  
 F N P L I Y C R S P D F R I A F Q E L L

1030 1040 1050 1060 1070 1080  
 TGCCTGCGCAGGCTTCTTTGAAGCCTATGGGAATGGCTACTCCAGCAACGGCAACACA  
 ACGGACGCGTCCAGAAGAACTTCCGGATACCCTTACCGATGAGGTCGTTGCCGTTGTGT  
 C L R R S S L K A Y G N G Y S S N G N T

1090 1100 1110 1120 1130 1140  
 GGGGAGCAGAGTGGATATCACGTGGAACAGGAGAAAGAAAATAAACTGCTGTGTGAAGAC  
 CCCCCTGCTCACCTATAGTGCACCTTGTCTCTTTCTTTTATTTGACGACACACTTCTG  
 G E Q S G Y H V E Q E K E N K L L C E D

1150 1160 1170 1180 1190 1200  
 CTCCAGGCACGGAAGACTTTGTGGGCCATCAAGGTAAGTGTGCCTAGCGATAACATTTGAT  
 GAGGTCCTGCTTCTGAAACACCCGGTAGTTCCATGACACGGATCGCTATTGTAACATA  
 L P G T E D F V G H Q G T V P S D N I D

1210 1220 1230 1240 1250 1260  
 TCACAAGGGAGGAATTTGTAGTACAAATGACTCACTGCTGTACCCAGCTTTCTTGTACAAA  
 AGTGTTCCTCCTTAACATCATGTTTACTGAGTGACGACATGGGTCGAAAGAACATGTTT  
 S Q G R N C S T N D S L L Y P A F L Y K

1270 1280 1290 1300 1310 1320  
 GTGGTTGATTTCTAGAGGTGGCGGTGGCTCTGGAGGTGGTGGGTCGACTACAAAGACCAT  
 CACCAACTAAGATCTCCACCGCCACCGAGACCTCCACCACCCAGGCTGATGTTTCTGGTA  
 V V D S R G G G G S G G G G S D Y K D H

1330 1340 1350 1360 1370 1380  
 GACGGTGATTTATAAAGATCATGACATCGATTACAAGGATGACGATGACAAGATGCAGATT  
 CTGCCACTAATATTTCTAGTACTGTAGCTAATGTTCTACTGCTACTGTTCTACGTTAA  
 D G D Y K D H D I D Y K D D D D K M Q I

1390 1400 1410 1420 1430 1440  
 TTCGTCAAGACTTTGACCGGTAAAACCATAACATTTGGAAGTTGAACTTCCGATACCATC  
 AAGCAGTTCTGAAACTGGCCATTTTGGTATTGTAACCTTCAACTTAGAAGGCTATGGTAG  
 F V K T L T G K T I T L E V E S S D T I

1450 1460 1470 1480  
 GACAACGTTAAGTCGAAAATTTCAAGACAAGGAAGGTATCTAA  
 CTGTTGCAATTCAGCTTTTAAAGTTCTGTTCTTCCATAGATT  
 D N V K S K I Q D K E G I \*

## H. Sequence of CD25-CUB-TF

10 20 30 40 50 60  
 ATGGAATTCATACCTGCTGATGTGGGACTGCTCACGTTTCATCATGGTGCCTGGCTGCCAG  
 TACCTAAGTATGACGACTACACCCCTGACGAGTGCAAGTAGTACCACGGACCGACGGTC  
 M D S Y L L M W G L L T F I M V P G C Q

70 80 90 100 110 120  
 GCAGAACTCTGTGACGATGACCCGCCAGAGATCCACACGCCACATTCAAAGCCATGGCC  
 CGTCTTGAGACTGCTACTGGCGGTCTCTAGGGTGTGGGTGTAAGTTTCGGTACCGG  
 A E L C D D D P P E I P H A T F K A M A

130 140 150 160 170 180  
 TACAAGGAAGGAACCATGTTGAACTGTGAATGCAAGAGAGGTTTCCGCAGAATAAAAAGC  
 ATGTTTCTTCTTGGTACAACCTTGACACTTACGTTCTCTCCAAGGCGTCTTATTTTTCG  
 Y K E G T M L N C E C K R G F R R I K S

190 200 210 220 230 240  
GGGTCACCTCTATATGCTCTGTACAGGAAACTCTAGCCACTCGTCCTGGGACAACCAATGT  
CCCAGTGAGATATACGAGACATGTCCCTTTGAGATCGGTGAGCAGGACCCTGTTGGTTACA  
G S L Y M L C T G N S S H S S W D N Q C

250 260 270 280 290 300  
CAATGCACAAGCTCTGCCACTCGGAACACAACGAAACAAGTGACACCTCAACCTGAAGAA  
GTTACGTGTTTCGAGACGGTGAGCCTTGTGTTGCTTTGTTCACTGTGGAGTTGGACTTCTT  
Q C T S S A T R N T T K Q V T P Q P E E

310 320 330 340 350 360  
CAGAAAGAAAGGAAAACACAGAAATGCAAAGTCCAATGCAGCCAGTGGACCAAGCGAGC  
GTCTTTCTTTTCTTTTGGTGTCTTTACGTTTCAGGTTACGTCGGTCACTGGTTCGCTCG  
Q K E R K T T E M Q S P M Q P V D Q A S

370 380 390 400 410 420  
CTTCAGGTCACTGCAGGGAACCTCCACCATGGGAAAATGAAGCCACAGAGAGAATTTAT  
GAAGGTCAGTGACGTCCCTTTGGAGGTGGTACCCTTTTACTTCGGTGTCTCTCTAAATA  
L P G H C R E P P P W E N E A T E R I Y

430 440 450 460 470 480  
CATTTCTGTTGGTGGGCGAGATGGTTTATATCAGTGCGTCCAGGATACAGGGCTCTACAC  
GTAAAGCACCACCCGCTACCAAATAATAGTCACGCAGGTCCCTATGTCCCGAGATGTG  
H F V V G Q M V Y Y Q C V Q G Y R A L H

490 500 510 520 530 540  
AGAGGTCTGCTGAGAGCGTCTGCAAAATGACCCACGGGAAGACAAGTGGACCCAGCCC  
TCTCCAGGACGACTCTCGCAGACGTTTTACTGGGTGCCCTTCTGTTCCACCTGGGTCCGG  
R G P A E S V C K M T H G K T R W T Q P

550 560 570 580 590 600  
CAGCTCATATGCACAGGTGAAATGGAGACCAGTCAGTTTCCAGGTGAAGAGAAGCCCTCAG  
GTCGAGTATACGTGTCCACTTTACCTCTGGTCACTCAAGGTCACCTTCTCTTCGGAGTC  
Q L I C T G E M E T S Q F P G E E K P Q

610 620 630 640 650 660  
GCAAGCCCGAAGGCCGCTCCTGAGAGTGAGACTTCCTGCCTCGTCACAACAACAGATTTT  
CGTTCCGGGGCTTCCGGCAGGACTCTCACTCTGAAGGACGGAGCAGTGTGTTGTCTAAAA  
A S P E G R P E S E T S C L V T T T D F

670 680 690 700 710 720  
CAAATACAGACAGAAATGGCTGCAACCATGGAGACGTCCATATTTACAACAGAGTACCAG  
GTTTATGCTGTCTTTTACCGACGTTGGTACCTCTGCAGGTATAAATGTTGTCTCATGGTC  
Q I Q T E M A A T M E T S I F T T E Y Q

730 740 750 760 770 780  
GTAGCAGTGGCCGGCTGTGTTTCTGCTGATCAGCGTCCCTCCTCCTGAGTGGGCTCACC  
CATCGTCACCGCCGACACAAGGACGACTAGTCGACAGGAGGACTCACCCGAGTGG  
V A V A G C V F L L I S V L L L S G L T

790 800 810 820 830 840  
TGGCAGCGGAGACAGAGGAAGAGTAGAAGAACAATCTACCCAGCTTTCTTGTACAAGTG  
ACCGTCGCCTCTGTCTCCTTCTCATCTTCTTGTAGATGGGTCGAAAGAACATGTTTCAC  
W Q R R Q R K S R R T I Y P A F L Y K V

850 860 870 880 890 900  
GTTGATCTAGAGGTGGCGGTGGCTCTGGAGGTGGTGGGTCCATGTCCGGGGGGATCCCT  
CAACTAAGATCTCCACCGCCACCGAGACTCCACCACCCAGGTACAGCCCCCTTAGGGA  
V D S R G G G S G G G S M S G G I P

910 920 930 940 950 960  
CCAGATCAACAAAGATTGATCTTTGCCGGTAAGCAGCTAGAAGACGGTAGAACCGTGTCT  
GGTCTAGTTGTTTCTAACTAGAAACGGCCATTGTCGATCTTCTGCCATCTTGGCAGAGA  
P D Q Q R L I F A G K Q L E D G R T L S

970 980 990 1000 1010 1020  
GATTACAACATTAGAAGGAGTCCACCTTACATCTTGTGCTAAGGCTAAGAGGTGGTATG  
CTAATGTTGTAAGTCTTCTCAGGTGGAATGTAGAACACGATTCGGATTCTCCACCATA  
D Y N I Q K E S T L H L V L R L R G G M

1030 1040 1050 1060 1070 1080  
CACAGATCAGCTTTGTGCGAGGTATCGATAAGCTTGATGAAGCTACTGTCTTCTATCGAA  
GTGTCTAGTCGAAACAGCTGCCATAGCTATTGCAACTACTTCGATGACAGAAGATAGCTT  
H R S A L S T V S I S L M K L L S S I E

1090 1100 1110 1120 1130 1140  
CAAGCATGCGATATTTGCCGACTTAAAAAGCTCAAGTGTCCAAAGAAAAACCGAAGTGC  
GTTTCGTACGCTATAACGGCTGAATTTTTCGAGTTACAGAGGTTCTTTTGGCTTCAGC  
Q A C D I C R L K K L K C S K E K P K C

1150 1160 1170 1180 1190 1200  
GCCAAGTGTCTGAAGAACAACCTGGGAGTGTCTGCTACTCTCCCAAACAAAAGGTCTCCG  
CGGTTACAGACTTCTTGTGACCCCTCACAGCGATGAGAGGGTTTTGGTTTTCCAGAGGC  
A K C L K N N W E C R Y S P K T K R S P

1210 1220 1230 1240 1250 1260  
CTGACTAGGGCACATCTGACAGAAGTGAATCAAGGCTAGAAAGACTGGAACAGCTATTT  
GACTGATCCCGTGTAGACTGTCTTACCTTAGTTCGGATCTTTCTGACCTTGTGCGATAAA  
L T R A H L T E V E S R L E R L E Q L F

1270 1280 1290 1300 1310 1320  
CTACTGATTTTTCTCGAGAAGACCTTGACATGATTTTGAAAATGGATCTTTTACAGGAT  
GATGACTAAAAGGAGCTCTTCTGGAAGTGTACTAAAACCTTTTACCTAAGAAAATGTCTTA  
L L I F P R E D L D M I L K M D S L Q D

1330 1340 1350 1360 1370 1380  
ATAAAAGCATTGTTAACAGGATTATTTGTACAAGATAATGTGAATAAAGATGCCGTGACA  
TATTTTCGTAACAATTGTCTAATAAACATGTTCTATTACACTTATTTCTACGGCAGTGT  
I K A L L T G L F V Q D N V N K D A V T

1390 1400 1410 1420 1430 1440  
GATAGATTGGCTTCAGTGGAGACTGATATGCCTCTAACATTGAGACAGCATAGAATAAGT  
CTATCTAACCGAAGTCACTCTGACTATACGGAGATTGTAACCTGTGCTATCTTATTCA  
D R L A S V E T D M P L T L R Q H R I S

1450 1460 1470 1480 1490 1500  
GCGACATCATCATCGGAAGAGAGTAGTAACAAAGGTCAAAGACAGTTGACTGTATCGATT  
CGCTGTAGTAGTAGCCTTCTCTCATCATGTTTCCAGTTTCTGTCAACTGACATAGCTAA  
A T S S S E E S S N K G Q R Q L T V S I

1510 1520 1530 1540 1550 1560  
TTTTCCCCATGCTGTTACCATCAGGGCAGATCTCAAACCAGGCCCTGGCCTTAGCACCG  
AAAAGGGGGTACGACAATGGTAGTCCCGTCTAGAGTTTGGTCCGGGACCGGAATCGTGGC  
F S P M L L P S G Q I S N Q A L A L A P

1570 1580 1590 1600 1610 1620  
TCCTCTGCCCCAGTCCCTGCCCCAGACCATGGTCCCTTCCTCAGCCATGGTACCTCTGGCT  
AGGAGACGGGGTCAGGAACGGGTCTGGTACCAGGGAAGGAGTCCGTACCATGGAGACCGA  
S S A P V L A Q T M V P S S A M V P L A

1630 1640 1650 1660 1670 1680  
CAGCCCCAGCTCCTGCCCCAGTTCTAACCCGGGTCTCCCCAGTCCCTGTCTGCACCT  
GTCGGGGTTCGAGGACGGGTCAAGATTGGGGCCAGGAGGGGTGAGGACAGACAGCTGGA  
Q P P A P A P V L T P G P P Q S L S A P

1690 1700 1710 1720 1730 1740  
GTCCAAAGAGCACCCAGGCTGGGGAAGGCACGCTGTGGAAGCCCTGTCACCTGCAG  
CAAGGTTTCTCGTGGGTCCGACCCCTTCCGTGCGACAGCCTTCGGGACGACGTGGACGTC  
V P K S T Q A G E G T L S E A L L H L Q

1750 1760 1770 1780 1790 1800  
TTTGATGCTGATGAAGACTTGGGGCCCTTGGTGGCAACAGCACAGACCAGGAGTGTTC  
AAACTACGACTACTTCTGAACCCCGGAACGAACCGTTGTGCTGCTGGGTCCCTACAAG  
F D A D E D L G A L L G N S T D P G V F

1810 1820 1830 1840 1850 1860  
ACAGACCTGGCATCTGTGGACAACCTCAGAGTTTCAGCAGCTCCTGAACCAGGGTGTGTCC  
TGTCTGGACCGTAGACACCTGTTGAGTCTCAAAGTCGTCGAGGACTTGGTCCCACACAG  
T D L A S V D N S E F Q Q L L N Q G V S

1870 1880 1890 1900 1910 1920  
ATGTCTCACTCCACAGCTGAGCCCATGCTGATGGAGTACCCTGAAGCTATAACTCGCCTG  
TACAGAGTGAGGTGTGACTCGGGTACGACTACCTCATGGGACTTCGATATTGAGCGGAC  
M S H S T A E P M L M E Y P E A I T R L

1930 1940 1950 1960 1970 1980  
GTGACAGGGTCCCAGAGGCCCTGACCCAGCTCCCACACCCCTGGGGACCTCGGGGCTT  
CACTGTCCCAGGTCTCCGGGGACTGGGTGAGGGTGTGGGGACCCCTGGAGCCCGAA  
V T G S Q R P P D P A P T P L G T S G L

1990 2000 2010 2020 2030 2040  
CCCAATGGTCTCTCCGGAGATGAAGACTTCTCCTCCATTGCGGACATGGACTTCTCTGCT  
GGGTTACCAGAGAGGCCTTACTTCTGAAGAGGAGGTAACGCCTGTACCTGAAGAGACGA  
P N G L S G D E D F S S I A D M D F S A

2050 2060 2070 2080 2090 2100  
CTTTTGAGTCAGATCAGCTCCGGAGGTGGCGGAGGTAAGCCTATCCCTAACCCCTCCTC  
GAAACTCAGTCTAGTCGAGGCCTCCACCGCTCCATTCGGATAGGGATTGGGAGAGGAG  
L L S Q I S S G G G G G K P I P N P L L

2110  
GGTCTCGATTCTACGTAA  
CCAGAGCTAAGATGCATT  
G L D S T \*

**Supplementary Table S1**

**A**

| Thymocyte population | Markers used in thymocyte fractionation | LMO2 TPM | CD34 TPM | CD4 TPM | CD8A TPM | CD8B TPM |
|----------------------|-----------------------------------------|----------|----------|---------|----------|----------|
| Thy1.1               | CD34+CD7-CD1a-CD4-CD8-                  | 87.8     | 307.5    | 82.8    | 5.6      | 0.4      |
| Thy1.2               | CD34+CD7-CD1a-CD4-CD8-                  | 295.8    | 1392.9   | 0       | 10.7     | 10.5     |
| Thy2.1               | CD34+CD7+CD1a-CD4-CD8-                  | 53.0     | 404.8    | 0       | 0        | 0.8      |
| Thy2.2               | CD34+CD7+CD1a-CD4-CD8-                  | 22.2     | 369.5    | 0.8     | 0.6      | 0        |
| Thy3.1               | CD34+CD7+CD1a+CD4-CD8-                  | 3.1      | 73.4     | 9.5     | 1.6      | 2.8      |
| Thy3.2               | CD34+CD7+CD1a+CD4-CD8-                  | 1.1      | 76.9     | 12.7    | 1.1      | 2.9      |
| Thy4.1               | CD4+CD8+                                | 0.5      | 0.8      | 393.3   | 254.4    | 168.8    |
| Thy4.2               | CD4+CD8+                                | 0        | 0        | 611.2   | 1006.3   | 659.4    |
| Thy5.1               | CD3+CD4+CD8-                            | 0        | 1.0      | 291.0   | 9.3      | 14.7     |
| Thy5.2               | CD3+CD4+CD8-                            | 1.3      | 0        | 371.8   | 44.4     | 22.0     |
| Thy6.1               | CD3+CD4-CD8+                            | 1.4      | 1.2      | 14.6    | 667.5    | 208.2    |
| Thy6.2               | CD3+CD4-CD8+                            | 0        | 0        | 5.3     | 859.4    | 398.8    |

**B**

| Mouse number | DN1  | DN2 | DN3  | DN4  |
|--------------|------|-----|------|------|
| 1            | 0.05 | 0.4 | 0.1  | 0.04 |
| 2            | 2.1  | 0.5 | 0.03 | 0.05 |
| 3            | 1.0  | 0.7 | 0.1  | 0.03 |

**Supplementary Table S1 Expression of LMO2 mRNA in normal human and mouse thymocytes compared to surface markers used in fractionation of thymus populations**

**Panel A.** Data are shown as TPM for each of the duplicate human thymocyte populations from Casero, Sandoval, Seet, Zhu, Ha, Luong, Parekh, Crooks Nature Immunology 16, 1282-91, 2015 doi: 10.1038/ni.3299

**Panel B.** Summary of data LMO2 TPM data from P19-21 wild type mouse fractionated thymocytes



## Supplementary Table S2

Surfaceome expression levels in Lck-Lmo2 transgenic and wild type DN cells. Each sheet on the table contains the average TPM expression levels in one of the DN stages for wild type and Lck-Lmo2 samples (in columns F and G respectively). Columns H and I contain the expression class, as defined in Figure 1 (0 means TPM <0.1, LOW means TPM between 0.1 and 1, MED means TPM between 1 and 10 and HIGH means TPM higher than 10).

<https://www.rdm.ox.ac.uk/about/our-divisions/nuffield-division-of-clinical-laboratory-sciences/nuffield-division-of-clinical-laboratory-sciences-research/rabbitts-group/rabbitts-group-news/supplementary-table-s1>

### Supplementary Table S3

#### A.

|                 |                |                  |                |                  |                |                  |
|-----------------|----------------|------------------|----------------|------------------|----------------|------------------|
| DN1<br>high;low | DN2<br>high; 0 | DN2<br>high; low | DN3<br>high; 0 | DN3<br>high; low | DN4<br>high; 0 | DN4<br>high; low |
| Angpt1          | Atp8a2         | Lmcd1            | Efemp2         | F2r              | Atp8a2         | Angpt1           |
| Gpr56           |                | Ly6e             | Lalba          | Psm6             | Insig2         | Bpifc            |
| Ifitm1          |                | Serpine2         | Lmcd1          | Serpine2         | Lalba          | Cd59a            |
| Ly6c1           |                | Tspan32          |                | Tspan32          | Lmcd1          | F2r              |
|                 |                |                  |                |                  |                | Lcn4             |
|                 |                |                  |                |                  |                | Mzb1             |
|                 |                |                  |                |                  |                | Scin             |

#### B.

| Gene name       | Genecard URL                                                                                                                        | Surface or secreted |
|-----------------|-------------------------------------------------------------------------------------------------------------------------------------|---------------------|
| <i>Angpt1</i>   | <a href="http://www.genecards.org/cgi-bin/carddisp.pl?gene=ANGPT1">http://www.genecards.org/cgi-bin/carddisp.pl?gene=ANGPT1</a>     | Secreted            |
| <i>Gpr56</i>    | <a href="http://www.genecards.org/cgi-bin/carddisp.pl?gene=ADGRG1">http://www.genecards.org/cgi-bin/carddisp.pl?gene=ADGRG1</a>     | Surface             |
| <i>CD225</i>    | <a href="http://www.genecards.org/cgi-bin/carddisp.pl?gene=IFITM1">http://www.genecards.org/cgi-bin/carddisp.pl?gene=IFITM1</a>     | Surface             |
| <i>Ly6c1</i>    | n/a                                                                                                                                 | Surface             |
| <i>Atp8a2</i>   | <a href="http://www.genecards.org/cgi-bin/carddisp.pl?gene=Atp8a2">http://www.genecards.org/cgi-bin/carddisp.pl?gene=Atp8a2</a>     | Surface             |
| <i>Lmcd1</i>    | <a href="http://www.genecards.org/cgi-bin/carddisp.pl?gene=LMCD1">http://www.genecards.org/cgi-bin/carddisp.pl?gene=LMCD1</a>       | nk                  |
| <i>Tspan32</i>  | <a href="http://www.genecards.org/cgi-bin/carddisp.pl?gene=TSPAN32">http://www.genecards.org/cgi-bin/carddisp.pl?gene=TSPAN32</a>   | Surface             |
| <i>Serpine2</i> | <a href="http://www.genecards.org/cgi-bin/carddisp.pl?gene=SERPINE2">http://www.genecards.org/cgi-bin/carddisp.pl?gene=SERPINE2</a> | Secreted            |
| <i>Ly6e</i>     | <a href="http://www.genecards.org/cgi-bin/carddisp.pl?gene=LY6E">http://www.genecards.org/cgi-bin/carddisp.pl?gene=LY6E</a>         | Surface             |
| <i>Lalba</i>    | <a href="http://www.genecards.org/cgi-bin/carddisp.pl?gene=LALBA">http://www.genecards.org/cgi-bin/carddisp.pl?gene=LALBA</a>       | Secreted            |
| <i>Efemp2</i>   | <a href="http://www.genecards.org/cgi-bin/carddisp.pl?gene=EFEMP2">http://www.genecards.org/cgi-bin/carddisp.pl?gene=EFEMP2</a>     | Secreted            |
| <i>Psm6</i>     | <a href="http://www.genecards.org/cgi-bin/carddisp.pl?gene=PSMA6">http://www.genecards.org/cgi-bin/carddisp.pl?gene=PSMA6</a>       | nk                  |
| <i>F2r</i>      | <a href="http://www.genecards.org/cgi-bin/carddisp.pl?gene=F2R">http://www.genecards.org/cgi-bin/carddisp.pl?gene=F2R</a>           | Surface             |
| <i>Insig2</i>   | <a href="http://www.genecards.org/cgi-bin/carddisp.pl?gene=INSIG2">http://www.genecards.org/cgi-bin/carddisp.pl?gene=INSIG2</a>     | ER                  |
| <i>CD53</i>     | <a href="http://www.genecards.org/cgi-bin/carddisp.pl?gene=CD53">http://www.genecards.org/cgi-bin/carddisp.pl?gene=CD53</a>         | Surface             |
| <i>CD59</i>     | <a href="http://www.genecards.org/cgi-bin/carddisp.pl?gene=CD59">http://www.genecards.org/cgi-bin/carddisp.pl?gene=CD59</a>         | Surface             |
| <i>CD7</i>      | <a href="http://www.genecards.org/cgi-bin/carddisp.pl?gene=CD7">http://www.genecards.org/cgi-bin/carddisp.pl?gene=CD7</a>           | Surface             |

#### C.

|                |                  |                  |                  |
|----------------|------------------|------------------|------------------|
| DN1<br>high; 0 | DN2<br>high; low | DN3<br>high; low | DN4<br>high; low |
| GRP56          | GPR56            | GPR56            | GPR56            |
|                | CD53             | CD53             | CD53             |
| CD59a          | CD59a            | CD59a            | CD59a            |
|                |                  |                  |                  |

**Supplementary Table S3.** Candidate mRNAs differentially expressed between age matched *Lck-Lmo2* transgenic and wild type DN cells.

**A.** Each column shows the gene name encoding the mRNA found in the RNA-seq surfaceome analysis where the expression in the *Lck-Lmo2* mRNA is high vs low or high vs 0 expression as indicated.

One mRNA (*Atp8a2*) is expressed in *Lck-Lmo2* DN2 and absent from wild type DN2 and four mRNAs (*Lmcd1*, *Ly6e*, *Serpine2* and *Tspan32*) have higher expression in *Lck-Lmo2* DN2 than in wild type. Similarly, three mRNAs (*Efemp2*, *Lalba* and *Lmcd1*) are expressed in *Lck-Lmo2* DN3 and absent in wild type DN3 and four mRNAs (*F2r*, *Psm6*, *Serpine2* and *Tspan32*) have higher expression in *Lck-Lmo2* DN3 than in wild type. From this restricted set of mRNAs, several encode proteins that are surface-

associated and others are secreted (Figure 1J). Of particular interest is *Tspan32* (a member of the tetraspanin family) that encodes a protein found in haematopoiesis and that has been implicated in malignancy.

**B.** Gene card information mRNAs differentially expressed between *Lck-Lmo2* transgenic and wild type DN cells.

The table lists the gene card information for each gene encoding mRNAs identified from the RNA-seq data. The Genecard URLs are listed and whether the protein products are found in the cell surface or secreted.

nk= not known

Insig2 is an endoplasmic reticulum (ER) associated protein

**C.** Each column shows the gene name encoding the mRNA found in the RNA-seq surfaceome analysis where the expression in the *Lck-Lmo2* mRNA is at least 10 x higher than the wild-type equivalents

#### **Supplementary Table S4**

TPM values for mRNAs that are exclusive to DN subsets (extracted from the RNA-seq data) or common to groups of DN subsets as indicated for development of the Venn diagram in Figure 1 (A-B)

<https://www.rdm.ox.ac.uk/about/our-divisions/nuffield-division-of-clinical-laboratory-sciences/nuffield-division-of-clinical-laboratory-sciences-research/rabbitts-group/rabbitts-group-news/supplementary-table-s2>

## **Supplementary Table S5**

TPM values for all mRNAs extracted from the RNA-seq data for development of the Venn diagrams in Figure 1 (A-B).

<https://www.rdm.ox.ac.uk/about/our-divisions/nuffield-division-of-clinical-laboratory-sciences/nuffield-division-of-clinical-laboratory-sciences-research/rabbitts-group/rabbitts-group-news/supplementary-table-s3>

**Supplementary Table S6**

| Human T-ALL primary | Translocation     | TPM value for LMO2 |
|---------------------|-------------------|--------------------|
| T1                  | t(11;14)(p13;q11) | 35.37              |
| T2                  | t(11;14)(p13;q11) | 94.16              |
| T3                  | t(11;14)(p13;q11) |                    |
| T4                  | t(11;14)(p13;q11) |                    |
|                     |                   |                    |
| NT1                 | n/a               | 2.89               |
| NT2                 | n/a               | 4.50               |
| NT3                 | n/a               | 7.77               |
| NT4                 | n/a               | 4.50               |
| NT5                 | n/a               | nd                 |
| NT6                 | n/a               | nd                 |
| NT7                 | n/a               | nd                 |
| NT8                 | n/a               | nd                 |
| NT9                 | n/a               | nd                 |
| NT10                | n/a               | nd                 |
| NT11                | n/a               | nd                 |

Human T-ALL samples used in this study.

T- *LMO2* translocation present

NT- no *LMO2* translocation present

### **Supplementary Table S7**

Surfaceome TPM expression levels in *Lck-Lmo2* transgenic tumours and human T cell tumours. RNA-seq TPM values for two *Lck-Lmo2* transgenic tumours and six human T cell tumours, two with LMO2-associated chromosomal translocations.

<https://www.rdm.ox.ac.uk/about/our-divisions/nuffield-division-of-clinical-laboratory-sciences/nuffield-division-of-clinical-laboratory-sciences-research/rabbitts-group/rabbitts-group-news/supplementary-table-s6>

### Supplementary Table S8

#### A. Human T-ALL

| mRNA  | T1  | T2  | NT1 | NT2 | NT3 | NT4 |
|-------|-----|-----|-----|-----|-----|-----|
| CD7   | 170 | 123 | 231 | 155 | 101 | 441 |
| CD53  | 67  | 144 | 91  | 141 | 57  | 121 |
| CD59  | 52  | 35  | 21  | 26  | 6   | 8   |
| GPR56 | 26  | 59  | 24  | 40  | 35  | 17  |

#### B. Mouse

| mRNA  | Ensembl code       | Tg DN1 | Tg DN2 | Tg DN3 | Tg DN4 | Wt DN1 | Wt DN2 | Wt DN3 | Wt Dn4 |
|-------|--------------------|--------|--------|--------|--------|--------|--------|--------|--------|
| CD53  | ENSMUST00000038845 | 284    | 203    | 183    | 326    | 221    | 82     | 27     | 26     |
| CD59a | ENSMUST00000040423 | 8      | 33     | 26     | 28     | 0.2    | 6      | 4      | 1      |
| GPR56 | ENSMUST00000093271 | 13     | 83     | 51     | 42     | 1      | 41     | 14     | 2      |
| GPR56 | ENSMUST00000179619 | 24     | 160    | 107    | 97     | 2      | 58     | 20     | 22     |

#### C. Mouse Tg/wt TPM ratios

| mRNA  | DN1 | DN2 | DN3 | DN4 |
|-------|-----|-----|-----|-----|
| CD53  | 1.3 | 3   | 7   | 13  |
| CD59a | 40  | 6   | 7   | 28  |
| GPR56 | 13  | 2   | 4   | 21  |
| GPR56 | 12  | 3   | 5   | 4   |

**Supplementary Table S8.** Expression of GPR56, CD53, and CD59a in mouse T cells and primary human T-ALL.

**A.** mRNA TPM values for *CD53*, *CD59* and GPR56 in the six human T-ALL samples for which RNA-seq data are available.

**B.** mRNA TPM values for *Cd53*, *Cd59* and *Gpr56* in the *Lck-Lmo2* and wild types DN cells. Two coding, splice variants of *Gpr56* are shown.

**C.** The ratio of mRNA expression levels for *Cd53*, *Cd59* and *Gpr56* in the *Lck-Lmo2* and wild types DN cells
